# Long-read sequencing reveals rapid evolution of immunity- and cancer-related genes in bats

Armin Scheben<sup>1</sup>, Olivia Mendivil Ramos<sup>2</sup>, Melissa Kramer<sup>2</sup>, Sara Goodwin<sup>2</sup>, Sara Oppenheim<sup>3</sup>, Daniel J Becker<sup>4</sup>, Michael C Schatz<sup>1,5</sup>, Nancy B Simmons<sup>6</sup>, Adam Siepel<sup>1\*</sup>, W Richard McCombie<sup>2\*</sup>

<sup>1</sup> Simons Center for Quantitative Biology, Cold Spring Harbor Laboratory, Cold Spring Harbor, NY

<sup>2</sup> Cold Spring Harbor Laboratory, Cold Spring Harbor, NY

<sup>3</sup> American Museum of Natural History, Sackler Institute for Comparative Genomics, New York, NY

<sup>4</sup> Department of Biology, University of Oklahoma, Norman, OK

<sup>5</sup> Departments of Computer Science and Biology, Johns Hopkins University, Baltimore, MD

<sup>6</sup> Department of Mammalogy, Division of Vertebrate Zoology, American Museum of Natural History, New York, NY

\*To whom correspondence should be addressed: [asiepel@cshl.edu](mailto:asiepel@cshl.edu), [mccombie@cshl.edu](mailto:mccombie@cshl.edu)

## Author ORCID iD

Armin Scheben: <https://orcid.org/0000-0002-2230-2013>

Olivia Mendivil Ramos: <https://orcid.org/0000-0003-3740-1943>

Melissa Kramer: N/A

Sara Goodwin: N/A

Sara Oppenheim: <https://orcid.org/0000-0003-1109-3639>

Daniel J Becker: <https://orcid.org/0000-0003-4315-8628>

Michael C Schatz: <https://orcid.org/0000-0002-4118-4446>

Nancy B Simmons: <http://orcid.org/0000-0001-8807-7499>

Adam Siepel: <https://orcid.org/0000-0002-3557-7219>

W Richard McCombie: <https://orcid.org/0000-0003-1899-0682>

## Abstract

Bats are exceptional among mammals for their powered flight, extended lifespans, and robust immune systems. To investigate the genomic underpinnings of unique bat adaptations, we sequenced the genomes of the Jamaican fruit bat (*Artibeus jamaicensis*) and the Mesoamerican mustached bat (*Pteronotus mesoamericanus*) and compared them to a diverse collection of 13 additional bat species together with other mammals. We used the Oxford Nanopore Technologies long-read platform to generate highly complete assemblies (N50: 28-29Mb) and facilitate analysis of complex genomic regions containing duplicated genes. Using gene family size analysis, we found that the type I interferon locus was contracted by eight genes in the most recent common ancestor (MRCA) of bats, shifting the proportion of interferon- $\omega$  to interferon- $\alpha$  and making interferon- $\omega$  the most common type I interferon in bats. Antiviral genes stimulated by type I interferons were also rapidly evolving, with interferon-induced transmembrane genes experiencing a lineage-specific duplication and strong positive selection in the gene *IFIT2*. Moreover, the lineage of phyllostomid bats showed an unprecedented expansion of *PRDM9*, a recombination-related gene also involved in infection responses, raising the possibility that this gene contributes to bat antiviral defenses. These modifications in the bat innate immune system may be important adaptations allowing them to harbor viruses asymptotically. We additionally found evidence of positive selection on the branch leading to the MRCA of bats acting on 33 tumor suppressors and six DNA repair genes, which may contribute to the low cancer rates and longevity observed across bats. These new genomic resources enable insights into the extraordinary adaptations of bats, with implications for mammalian evolutionary studies and public health.

## 1 Introduction

2  
3 Bats (order Chiroptera) form the second largest order of mammals and are known for a wide  
4 variety of remarkable adaptations including powered flight<sup>1</sup>, laryngeal echolocation<sup>2,3</sup>, unusual  
5 longevity<sup>4</sup>, and low rates of cancer<sup>5</sup>. Bats are also hosts of diverse viruses<sup>6,7</sup> and have played  
6 roles in outbreaks of emerging zoonotic viruses including Marburg virus<sup>8</sup>, Nipah virus<sup>9</sup>, and both  
7 severe acute respiratory syndrome coronavirus 1 (SARS-CoV-1)<sup>10</sup> and SARS-CoV-2<sup>11</sup>, either  
8 through direct human contact or via bridge hosts. It has been suggested that their tolerance of  
9 many viral infections stems from unusual features of their innate immune response<sup>12</sup>. Together,  
10 these adaptations make bats a powerful system for investigating a wide variety of genotype-to-  
11 phenotype relationships, including several with implications for human health. For example, by  
12 better understanding the mechanisms of the bat immune system that allow them to tolerate viral  
13 infections<sup>5</sup>, we may be better able to prevent zoonotic outbreaks. In addition, comparative  
14 genomic analyses of bats and cancer-susceptible mammals may shed new light on the causes of  
15 cancer and links between cancer and immunity<sup>13</sup>. Importantly, such studies of bats and other non-  
16 model organisms are highly complementary to studies based on mouse models, which are far  
17 more amenable to experimental manipulation but exhibit fewer natural adaptations relevant to  
18 human disease.

19  
20 With these goals in mind, investigators have sequenced and assembled the genomes of at least  
21 43 bat species over the past decade (**Table S1**). Recently, sequencing efforts in bats have been  
22 accelerated by the Bat1K global genome consortium<sup>14</sup> (<http://bat1k.com>), DNA Zoo<sup>15</sup>  
23 (<https://www.dnazoo.org/>) and Vertebrate Genome Project  
24 (<https://vertebrategenomesproject.org>). These new genome sequences have revealed numerous  
25 intriguing features of the immune systems of bats<sup>12,16–22</sup>. In particular, several genes with key roles  
26 in the innate immune system appear to have adaptively evolved in bats, including primary lines  
27 of inducible host defences such as pathogen sensors<sup>16,23</sup>, type I interferons (IFNs)<sup>12,24</sup> and antiviral  
28 genes<sup>25</sup>. Specifically, bats have lost the mammalian PYHIN DNA-sensing gene family<sup>17,26</sup>, they  
29 show evidence of positive selection in pathogen-sensing Toll-like receptors (TLRs)<sup>23</sup>, and they  
30 display copy-number variation in type I IFN cytokines<sup>12,24</sup>, which are induced by TLRs. Bat-specific  
31 modifications in tumor suppressors, DNA damage checkpoint-DNA repair pathway genes<sup>17</sup>, and  
32 growth hormone<sup>27</sup> may be associated with cancer resistance. It is thought that these adaptations  
33 in innate immunity and cancer resistance may have arisen as a result of coevolution of bats with  
34 viruses<sup>18,28</sup>, and that a need for enhanced DNA repair in the face of elevated reactive oxygen  
35 species (ROS) may have been a consequence of powered flight<sup>17</sup>.

36  
37 In this study, we augment previously existing genome sequences with new Oxford Nanopore  
38 Technologies (ONT)-based long-read assemblies for the Jamaican fruit bat (*Artibeus*  
39 *jamaicensis*) and the Mesoamerican mustached bat (*Pteronotus mesoamericanus*) (**Figure S1**).  
40 We present a comprehensive analysis of these genome sequences together with 13 previously  
41 assembled bats and other mammalian genomes. Importantly, long-read assemblies enable  
42 dramatic improvements in the characterization of gene duplications and losses, and of genomic  
43 repeats<sup>29–31</sup>. These benefits are of particular value in studies of mammalian immunity-related  
44 genes, many of which fall in highly repetitive genomic regions including large arrays of duplicated

45 genes<sup>32</sup>. Our comparative genomic analysis of these genome sequences provides several new  
46 insights into unique features of innate immune response and cancer resistance in bats.

## 47 Results

### 48 Genomic structure of *A. jamaicensis* and *P. mesoamericanus*

49  
50 Except for two recently published studies<sup>12,18</sup>, most previous genomic investigations in bats have  
51 relied on short-read assemblies based on Illumina DNA sequencing technology, which has limited  
52 the study of complex regions. In this case, we were able to leverage the ONT long-read  
53 sequencing platform and an optimized flye<sup>33</sup>-PEPPER<sup>34</sup>-POLCA<sup>35</sup> assembly and polishing  
54 strategy (**Methods**) to generate reference-quality assemblies for *A. jamaicensis* and *P.*  
55 *mesoamericanus* with contig N50 values of 28-29Mb (**Figure S2, Table S2**) and POLCA  
56 consensus accuracy >99.99%. Using EVIDENCEModeler, we annotated 21,621 genes in *A.*  
57 *jamaicensis* and 21,269 genes in *P. mesoamericanus*. Based on a BUSCO protein assessment  
58 of our annotations, the gene sets in both bats are highly complete at 98.3% and 98.2%  
59 respectively, comparable to the values of 97.4-98.3% reported for six recent PacBio-based bat  
60 assemblies (**Figure S3**). Notably, all of these long-read bat assemblies have BUSCO scores  
61 approaching those of the human (99.9%) and mouse (99.9%) annotations. Orthofinder orthology  
62 detection produced 19,935 orthogroups for 15 bats and 5 outgroup mammals, of which 12,517  
63 single-copy orthogroups were set aside for our positive selection analysis (below). Total fractions  
64 of 39.2% and 37.9% of the *A. jamaicensis* and *P. mesoamericanus* genomes consisted of repeats,  
65 respectively, with 0.4% in each genome attributed to recently active transposons including hAT,  
66 TcMariner, and piggyBac elements (**Figure S4, Table S3**). We also detected non-retroviral  
67 endogenous viral elements, predominantly derived from Bornaviridae and Parvoviridae (**Table**  
68 **S4**). We provide our annotations, aligned evidence, and multiple genome alignments as a public  
69 UCSC genome browser instance (<http://compgen.cshl.edu/bat/>).

### 70 Gene family expansion and contraction analysis

71 Changes in gene family size have played an important role in shaping the immune systems of  
72 bats<sup>17,26</sup>. To facilitate further analysis of gene family expansions and contractions, we focused on  
73 our new ONT-based assemblies and the previously published long-read bat genome sequences.  
74 By comparing these bat genomes with mammalian outgroups (human, mouse, dog, pig, and  
75 horse), we identified four expanded gene families and 47 contracted gene families in the most  
76 recent common ancestor of bats (hereafter, the “bat MRCA”; **Table S5**). Twenty-five of the gene  
77 families changing size on the bat ancestral branch were related to immune system processes,  
78 including the previously identified PYHIN gene family (PTHR12200)<sup>26</sup>, which we confirmed to be  
79 entirely absent in all bats including the two newly sequenced species.

## 80 The type I interferon locus is contracted in bats

81 The type I IFN immune response is a critical component of the mammalian innate immune system,  
82 and is responsible for activating the expression of a battery of antiviral genes following induction  
83 by pathogen-sensing components such as PYHINs, TLRs, and *cGAS-STING*<sup>36</sup>. Previous  
84 comparative analyses of the type I IFN locus have shown that it is highly structurally variable in  
85 bats and other mammals<sup>24</sup>, with some bats, such as *Pteropus alecto*, showing a contraction<sup>24</sup>,  
86 whereas others such as *Rousettus aegyptiacus*<sup>12</sup>, *Pteropus vampyrus*, and *Myotis lucifugus*<sup>37</sup>  
87 show evidence of expansions. However, this locus is generally large and highly duplicated across  
88 mammals (e.g., in humans, it spans ~400kb and contains 16 IFN genes, including 13 IFN- $\alpha$  genes  
89 and one IFN- $\omega$  gene), making it challenging to assemble and analyze.

90  
91 Using our expanded set of long-read-based bat genomes, we found clear evidence of a major  
92 contraction (-8 genes; Viterbi method, see ref.<sup>38</sup>,  $p=6.4e-11$ ) of the type I IFN gene family in the  
93 bat MRCA (**Figure 1, Figure S5**). Interestingly, we found that this contraction was driven  
94 specifically by loss of IFN- $\alpha$  genes, with gene counts of 0-4 in bats compared to 10-18 in the  
95 outgroup mammals (**Figure 1**). In contrast, IFN- $\omega$  gene counts in the bat ancestor were largely  
96 unchanged (Viterbi method,  $p=0.51$ ), ranging from 3-7 in bats and 0-8 in other mammals. As a  
97 consequence, IFN- $\omega$  was 11-fold enriched relative to IFN- $\alpha$  in bats compared to the other  
98 mammals (Fisher's exact test,  $p=4.5e-11$ , odds ratio=10.80) and this enrichment was observed  
99 in every bat species (**Table S6**). Considering the relative ligand-binding and antiproliferative  
100 properties of IFN- $\omega$  and IFN- $\alpha$ <sup>39,40</sup>, these changes in gene number could potentially be responsible  
101 for more potent responses to viral infections in bats relative to other mammalian orders (see  
102 **Discussion**).

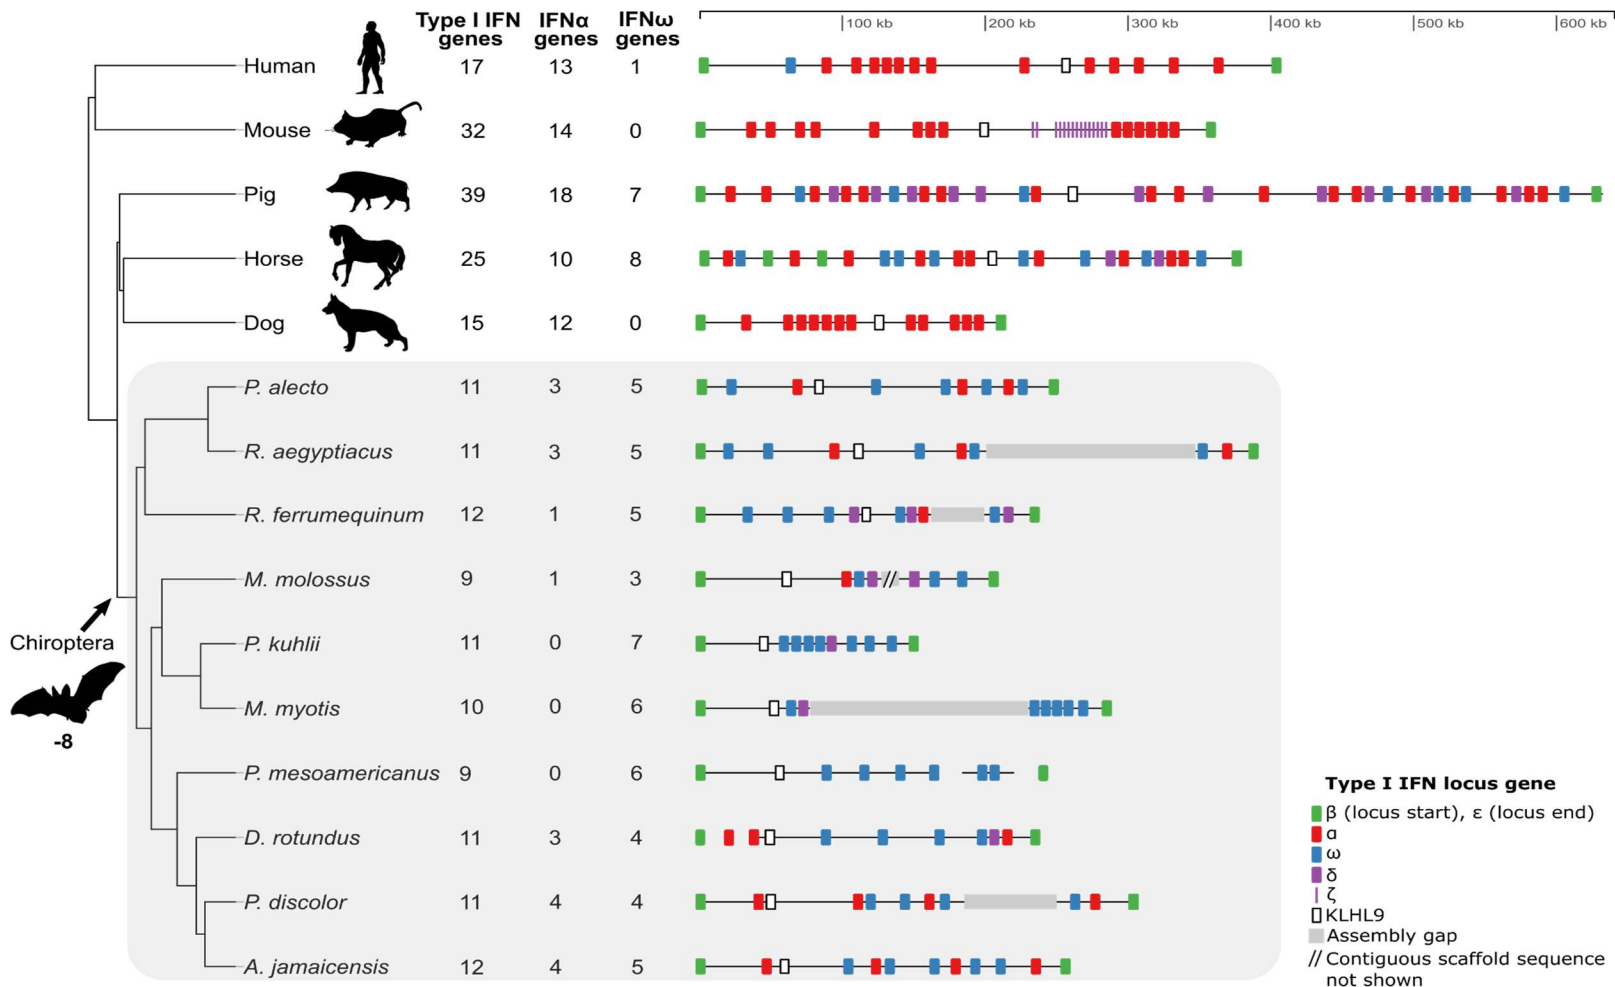

103  
 104 **Figure 1. Contraction of the type I interferon (IFN) locus in bats compared to other mammals.** A loss of eight genes in the bat  
 105 MRCA was estimated by CAFE<sup>38</sup> (Viterbi method,  $p=6.4e-11$ ). The reduction in locus size occurred together with a significant loss of  
 106 IFN- $\alpha$  genes but not IFN- $\omega$  genes in the bat MRCA (Fisher's exact test,  $p=4.5e-11$ , odds ratio=10.80). The type I IFN loci in bats (grey  
 107 background) are shown for long-read based assemblies as well as a BAC-based locus assembly<sup>24</sup> (*P. alecto*) and an Illumina-based  
 108 assembly<sup>19</sup> (*Desmodus rotundus*). Abbreviated species names: *Rhinolophus ferrumequinum*, *Molossus molossus*, *Pipistrellus kuhlii*,  
 109 *Myotis myotis*, and *Phyllostomus discolor*.

110 Antiviral interferon-induced transmembrane genes are expanded in yangochiropteran  
111 bats

112 An important downstream consequence of the activation of type I IFNs is the expression of various  
113 antiviral IFN-stimulated genes (ISGs)<sup>41</sup>. In bats, several of these genes, such as *tetherin* and  
114 *APOBEC3*, have also been shown to be under positive selection<sup>42</sup> or are duplicated<sup>18</sup>. Among  
115 antiviral ISGs, we observed an expansion of the immune-related IFN-induced transmembrane  
116 (IR-IFITM) gene family (+2 genes; Viterbi method,  $p=1.6e-3$ ) on the branch leading to the  
117 Yangochiroptera, the suborder that includes most microbats (**Figure 2**). The IR-IFITMs—which  
118 have previously been reported to be under positive selection in bats<sup>43</sup>—are potent broad-  
119 spectrum antiviral factors that help to prevent infection before a virus passes the lipid bilayer of  
120 the cell<sup>44,45</sup>. By applying a dN/dS-based branch-site likelihood ratio test (**Methods**), we confirmed  
121 using our data that the IR-IFITMs show evidence of positive selection in the bat MRCA ( $p=6.4e-$   
122  $3$ ). Furthermore, we identified seven particular codon sites that show signs of episodic diversifying  
123 selection (**Table S7**), including three sites in the CD225 domain (codons 68, 70, and 117).  
124 Notably, codons 68 and 70 in the CD255 domain are among several sites previously shown to be  
125 critical for blocking viral infection<sup>43</sup>. Furthermore, the methionine-to-phenylalanine substitution at  
126 codon 68, occurs in an amphipathic helix previously shown to be essential for blocking viral  
127 infection<sup>46</sup>. Together these observations of gene duplications and positive selection in functional  
128 domains in IR-IFITMs suggests that this gene family may have played an important role in the  
129 evolution of antiviral responses in bats.

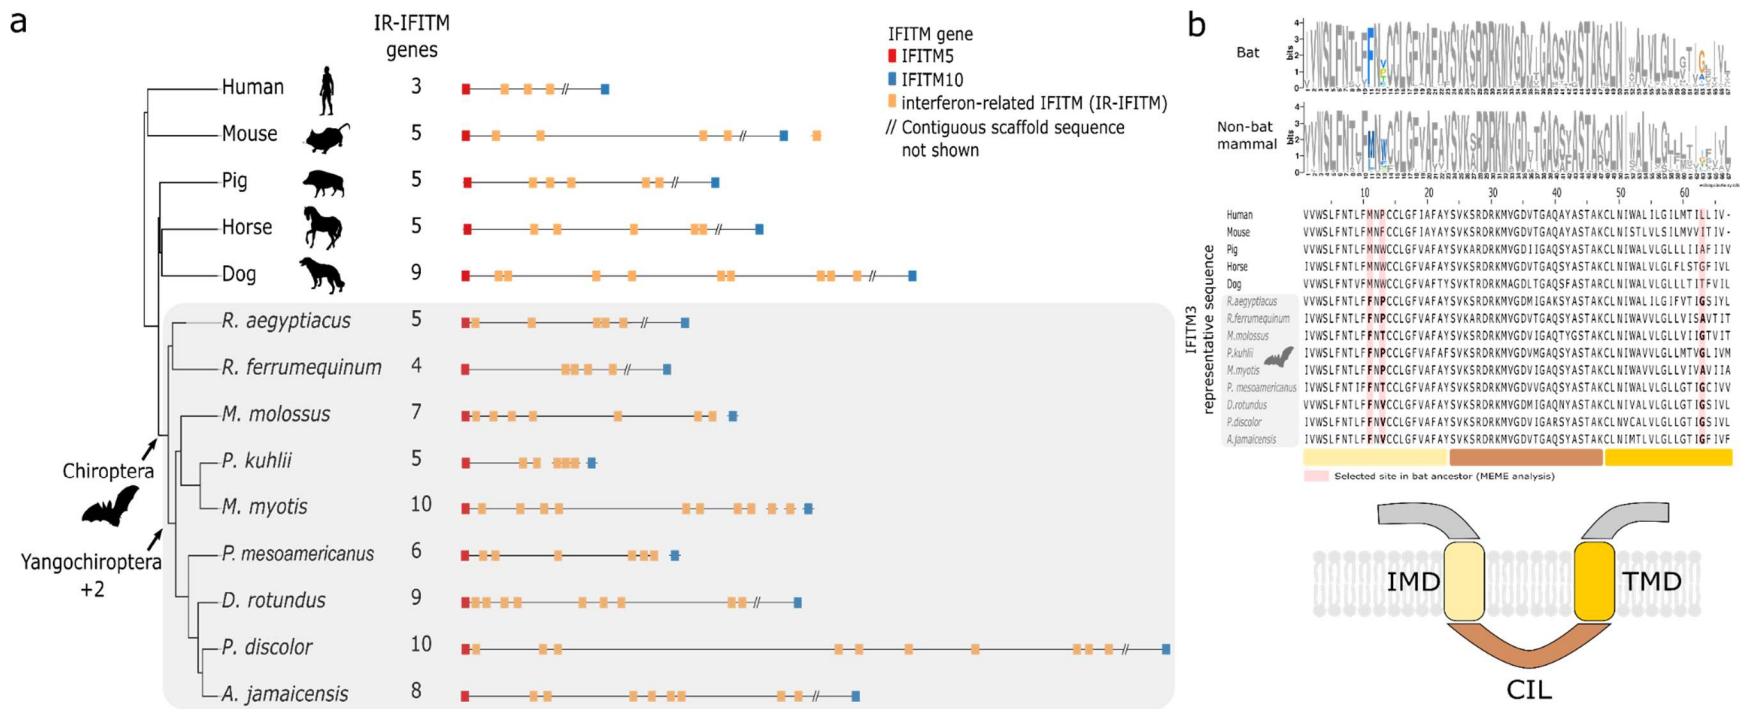

130  
131

132 **Figure 2. IFITM gene family expansion and positive selection associated with the bat antiviral immune response.** a) Phylogeny  
 133 of bats and other mammals, showing a significant increase in gene copy number at the IFITM locus in yangochiropteran bats based  
 134 on CAFE<sup>38</sup> analysis. Immune-related interferon-induced transmembrane (IR-IFITM) genes are shown in yellow. b) Three codon sites  
 135 in the IFITM transmembrane domains IMD and TMD in bats show evidence of positive selection (see also **Table S7**). The sequence  
 136 logo (top) compares a 67-amino-acid region spanning these domains with orthologous regions from other mammals (selected sites in  
 137 color). The sequence alignment (middle) compares human *IFITM3* with the most similar representative IR-IFITM ortholog from the  
 138 other species (selected sites highlighted with red background and shown in bold). The protein model (bottom) is based on a published  
 139 transmembrane topology<sup>47</sup>.



140 Expansion of *PRDM9* in phyllostomid bats and expansion of heat shock proteins in *P.*  
141 *mesoamericanus*

142 A third gene family to emerge from our survey of gene expansions and contractions was *PRDM9*  
143 (**Table S8**), which specifies the location of meiotic recombination sites<sup>48</sup> and is known to evolve  
144 rapidly in vertebrates<sup>49</sup>. *PRDM9* may play a role in speciation<sup>50</sup> and is also upregulated upon viral  
145 infection<sup>51</sup>. We found that *PRDM9* experienced a striking expansion in phyllostomid bats (+5  
146 genes; Viterbi method,  $p=1.2e-09$ ; **Figure S6**), far beyond anything observed in other mammals.  
147 Intriguingly, many of the *PRDM9* copies in phyllostomid bats have lost the KRAB domain (**Table**  
148 **S9**), which is thought to play an important role in recruiting the recombination machinery<sup>49</sup>,  
149 suggesting they may have alternate functions. Finally, we observed a major expansion in *P.*  
150 *mesoamericanus* of heat-shock proteins across multiple gene families, including heat-shock  
151 protein 70kDa (PTHR19375, +11 genes; Viterbi method,  $p=8.2E-14$ ). Interestingly, this expansion  
152 was largely restricted to *P. mesoamericanus* and was not observed across other bats.  
153 Overexpression of heat-shock proteins can modulate immune responses<sup>52</sup>, therefore this  
154 duplication may have implications for immunity in *P. mesoamericanus*.

## 155 Positive selection analysis

156 Having identified signatures of positive selection at the amino-acid level in several gene families  
157 of interest, we applied similar branch-site likelihood ratio tests<sup>53–55</sup> genome-wide, focusing on  
158 12,517 single-copy orthologs present in bats and outgroup mammals. Because we were most  
159 interested in adaptations shared by most bats, we mainly focused on a test for positive selection  
160 on the branch leading to the bat MRCA, where we expected to have reasonably good statistical  
161 power. However, we also tested for positive selection on the lineages leading to each of the two  
162 newly sequenced bats. Observing a highly skewed distribution of nominal  $p$ -values ( $p>0.98$  in  
163 86% of tests), we opted to follow a recent study<sup>56</sup> and omit a correction for multiple comparisons  
164 across orthologs, instead adjusting only for testing on three different branches (but see **Table S10**  
165 and **Data S1** for more conservative adjusted  $p$ -values). Based on this strategy, we identified 468  
166 positively selected genes (PSGs) with adjusted  $p<0.05$  in the bat MRCA (**Figure 3, Table S10**).  
167 This number is roughly comparable to the 298 PSGs recently identified for the Phyllostomidae  
168 bat lineage using a similar filtering approach<sup>56</sup> but somewhat larger than the numbers found on  
169 the branch leading to the bat MRCA in recent studies that used more stringent criteria (181  
170 PSGs<sup>20</sup> and 23 PSGs<sup>18</sup>). These PSGs were strongly enriched for immune-related functions (**Table**  
171 **S11**), including the major GO biological processes “regulation of inflammatory response”  
172 (GO:0050727,  $p=6.1e-4$ ) and “innate immune response” (GO:0045087,  $p=6.2e-4$ ). In total, 125  
173 PSGs (27% of the 468) were annotated with the parent term “immune system process”  
174 (GO:0002376). The bat MRCA branch was also enriched for PSGs involved in “positive regulation  
175 of reactive oxygen species (ROS)” (GO:2000379,  $p=3.5e-4$ ), possibly suggesting adaptations  
176 associated with heightened metabolic rates owing to flight (see **Discussion**). Moreover, we  
177 detected six autophagy-related PSGs (**Table S10**), including autophagy regulator *ATG9B* which  
178 was previously implicated in bat longevity<sup>57</sup>. Below, we further discuss some specific PSGs falling  
179 in two major classes: (1) pathogen sensors, cytokines, and antiviral genes; and (2) DNA repair  
180 genes and tumor suppressors.

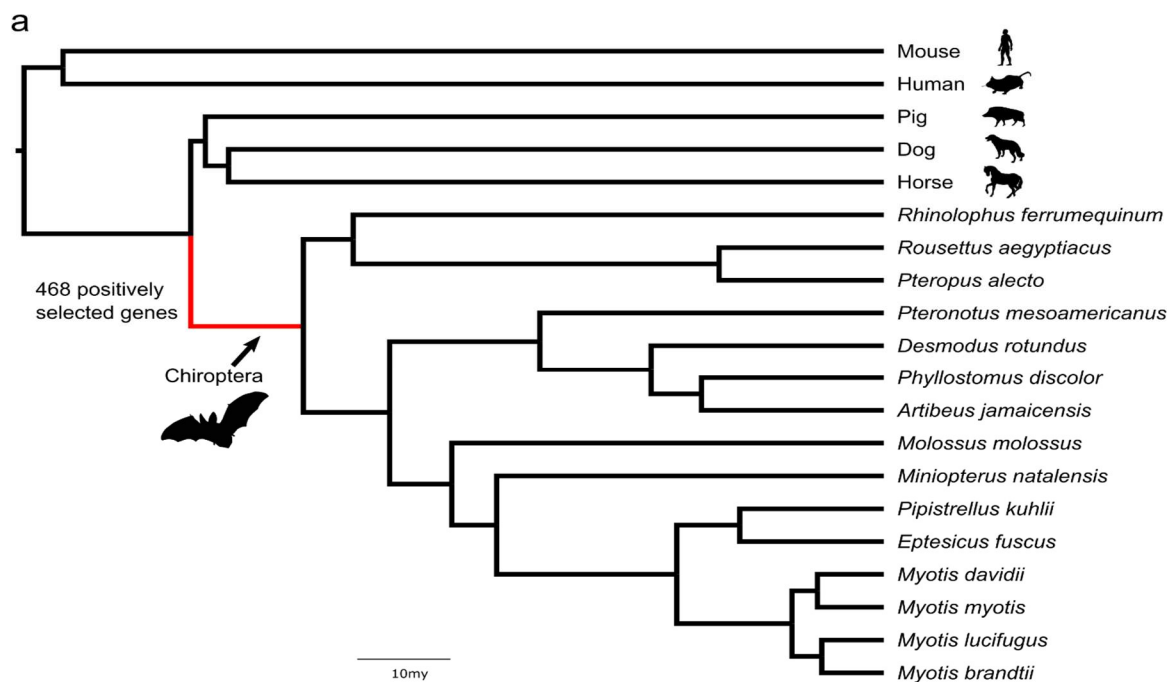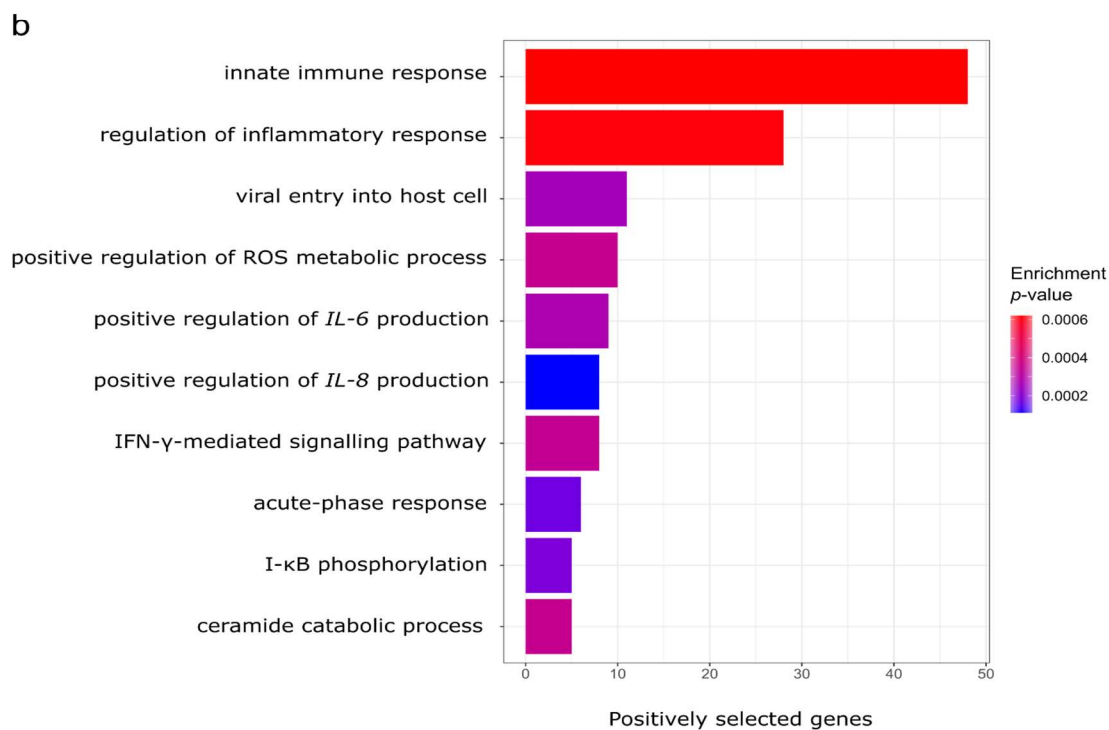

181

182 **Figure 3. Positive selection scan on the bat ancestral branch.** a) Maximum likelihood  
183 phylogeny based on codon-site partitioned analysis of 3,632 gene alignments, with the bat  
184 ancestral branch indicated. b) TopGO hierarchical gene ontology enrichment analysis of the  
185 positively selected genes against the background set of tested genes, suggesting strong  
186 enrichment of innate immunity genes. The ten most significant GO terms are shown, eight of  
187 which are related to innate immunity including genes involved in interleukin regulation and  
188 interferon pathways.

## 189 Pathogen sensors, interleukins, and antiviral genes in bats are rapidly evolving

190 The 468 PSGs on the bat ancestral branch included several genes that encode proteins with  
191 pathogen-sensing roles. For example, the TLR-encoding genes *TLR7* and *TLR8*, are included in  
192 our set (**Table S10**), and the related *TLR9* (which shows reduced activation in bats<sup>58</sup>) was on the  
193 threshold of statistical significance ( $p=0.05$ ). All of these genes have been identified in previous  
194 scans for positive selection<sup>16,23</sup>. Another previously identified PSG in our set is the IFN stimulator  
195 *STING*<sup>59</sup>. The TLRs and *STING*, as well as the PSG *NLRP3*<sup>17,60</sup>, all play important roles in  
196 inflammation and are considered therapeutic targets for inflammatory disease<sup>61–64</sup>. Positive  
197 selection in these genes may play a role in dampening downstream responses to pathogens.  
198 Interestingly, the location of a bat-specific substitution in codon 358 of *STING* that was linked to  
199 dampened IFN activation<sup>59</sup> was identified in our scan as one of ten positively selected sites (**Table**  
200 **S7**). In addition to these previously identified PSGs, we identified *TLR2* to be under positive  
201 selection. Unlike the nucleic-acid sensing *TLRs* 7,8, and 9, *TLR2* recognizes lipoproteins of  
202 pathogens such as bacteria and enveloped viruses<sup>65</sup>. *TLR2* signalling also induces the  
203 inflammatory cytokine *TNF- $\alpha$*  in infections with viruses like SARS-CoV-2, and blocking *TLR2*  
204 protects against pathogenesis caused by the ‘cytokine storm’<sup>66</sup>. We additionally found evidence  
205 of positive selection in the key TLR regulator *UNC93B1*<sup>67</sup>, which is regulated by type I IFNs<sup>68</sup>.  
206 *UNC93B1* is thought to regulate nucleic-acid sensing TLRs such as *TLR7* and *TLR9* upstream of  
207 the process of TLR trafficking from the endoplasmic reticulum to endolysosomes<sup>69,70</sup>.

208 Another group prominently represented in our PSGs are genes encoding the interleukins, a  
209 collection of cytokines with diverse functions in immunity and inflammation<sup>71,72</sup>. In bats, earlier  
210 work identified reduced expression of *interleukin-8*<sup>68</sup>, positive selection of *interleukin-1 $\beta$* , and loss  
211 of *interleukin-36 $\gamma$* <sup>18</sup>, suggesting that rapid evolution of interleukins may have contributed to unique  
212 adaptations in bat immunity. We found that five interleukin-related GO categories were  
213 significantly enriched for PSGs in bats (**Table S11**), including “interleukin-1 $\beta$  production”  
214 (GO:0032611,  $p=0.00075$ ) and “positive regulation of interleukin-6 production” (GO:0032755,  
215  $p=0.00028$ ). In addition, we identified the pleiotropic cytokine-encoding genes *interleukin-6* and  
216 *interleukin-15* as PSGs as well as the genes encoding several interleukin-associated receptors  
217 (**Table S10**). *Interleukin-6*, which encodes one of the most important cytokines during infection<sup>73</sup>,  
218 showed six sites predicted to be positively selected in bats and a high ratio of nonsynonymous to  
219 synonymous mutations on the bat MRCA branch (dN/dS=2.72). Inflammatory cytokine-encoding  
220 genes such as *interleukin-6* and *interleukin-15* that were under positive selection in the bat MRCA  
221 could be additional contributors to dampened inflammation in bats.

222 Our PSGs also included several antiviral IFN-stimulated genes, which, as noted above, are  
223 activated by type I IFNs<sup>41</sup> and in several cases (including *APOBEC3* and *Mx*) have been shown  
224 to be duplicated<sup>18</sup> and/or under positive selection<sup>25,74</sup> in bats. For example, we detected positive  
225 selection in *PARP9*, whose gene product interacts with those of *DTX3L* and *STAT1* to enhance  
226 IFN responsiveness<sup>75,76</sup>. We also found strong evidence of positive selection, affecting at least 18  
227 amino-acid sites, in *IFIT2*, whose product inhibits replication of a broad range of RNA and DNA  
228 viruses<sup>77,78</sup> (**Figure 4**). Ten of the positively selected sites overlap or are physically close to sites  
229 known to impact RNA-binding in the TPR4, TPR5, TPR6 and TPR9 motifs<sup>79</sup>, and a bat-specific  
230 lysine-to-methionine substitution occurs at codon 255 which is involved in RNA-binding<sup>79</sup> (**Figure**

231 4). Positive selection of *IFIT2* in bats may therefore alter, and possibly enhance, expression of  
 232 numerous antiviral response genes. Taken together, our results provide novel evidence for rapid  
 233 evolution in the innate immune system of bats (**Figure 5**).

234

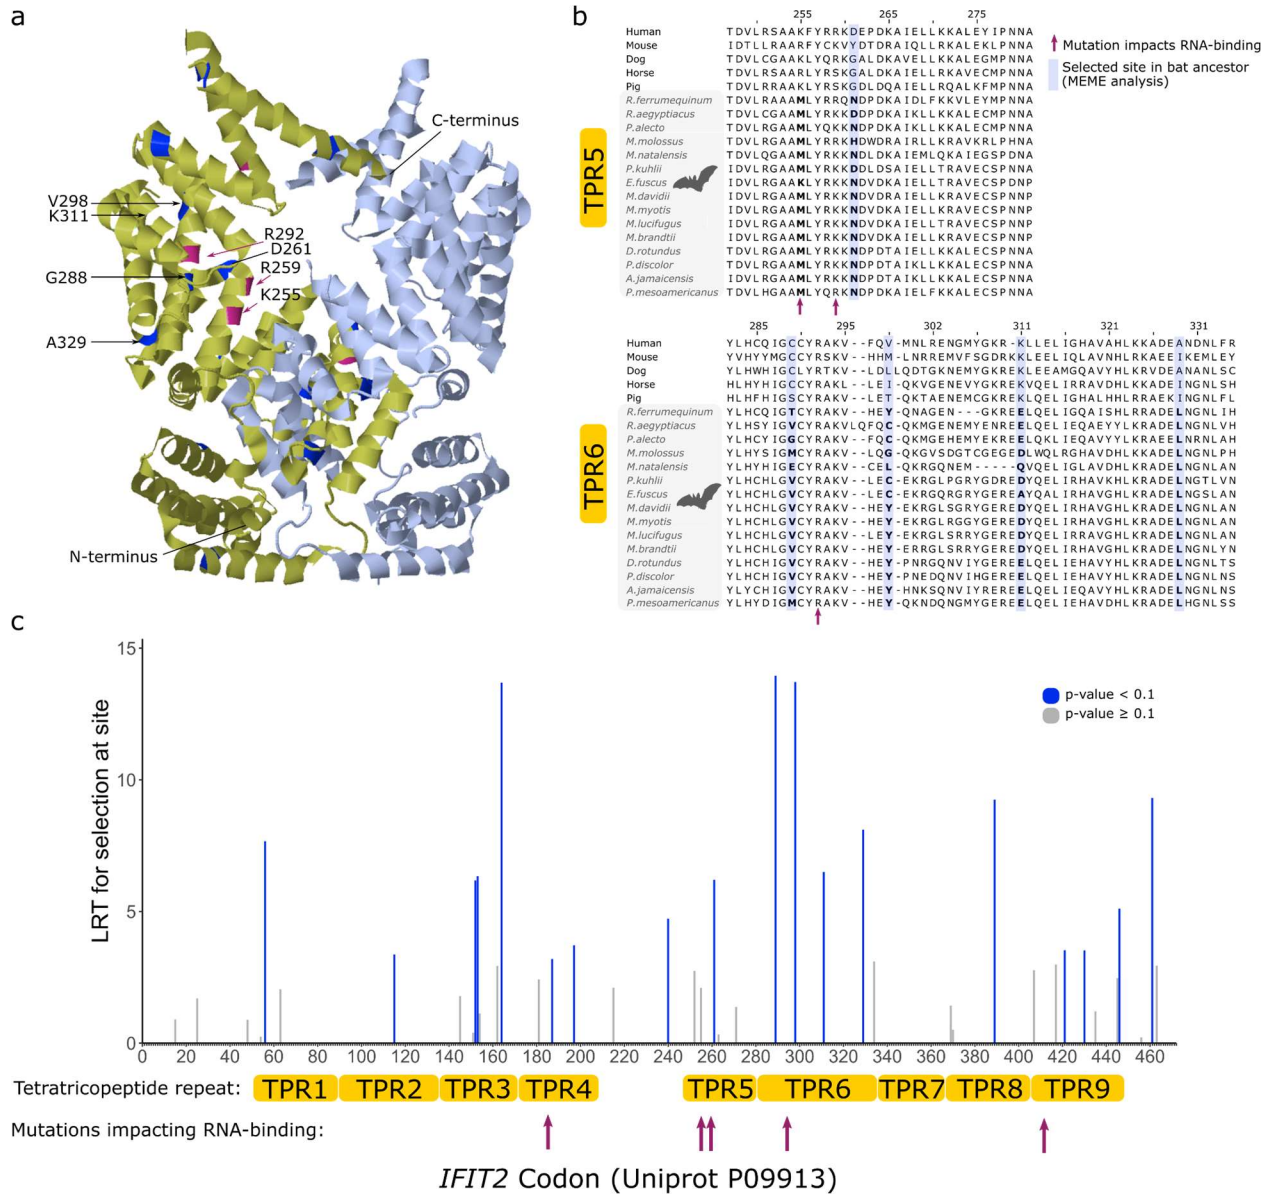

235

236 **Figure 4. The antiviral gene *IFIT2* is positively selected in RNA-binding regions in bats.** a)  
 237 3D-structure of the *IFIT2* protein (PDB:4G1T) showing sites selected in the bat ancestor (blue)  
 238 and sites known to be involved in RNA-binding function of the protein (purple). b) Amino acid  
 239 alignment of the tetratricopeptide repeat (TPR) regions TPR5 and TPR6 (based on UniProt  
 240 annotation for P09913) showing sites selected in the bat ancestor (blue highlighting and bold)  
 241 and a fixed bat lysine-to-methionine substitution in codon 255 which is located in a region involved in

242 RNA-binding (indicated with purple arrow). c) MEME<sup>105</sup> analysis of *IFIT2* codon sites showing 18  
 243 sites selected in bats based on a likelihood ratio test.

244

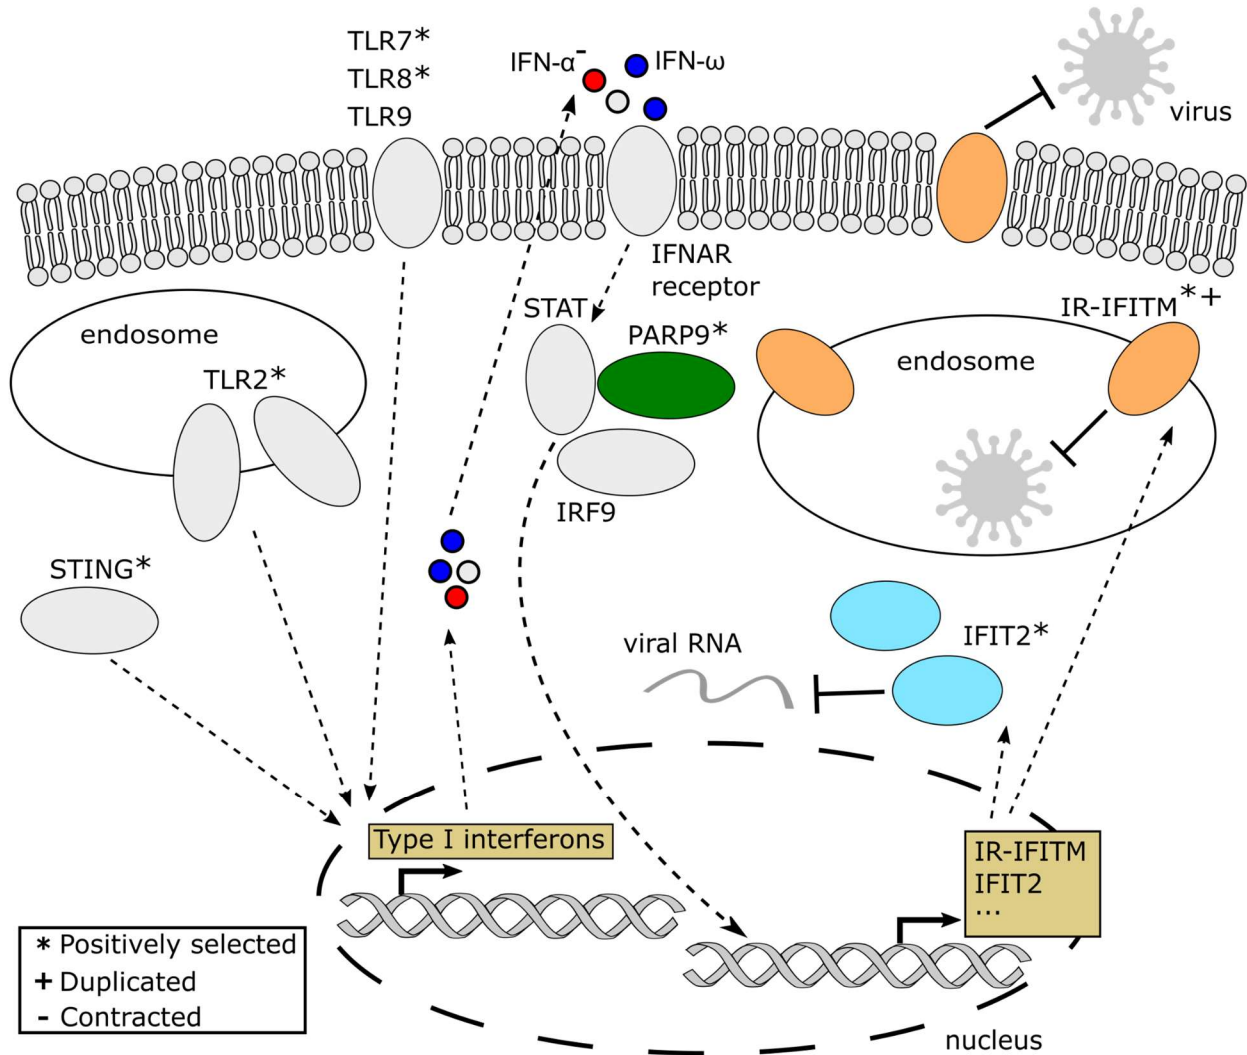

245

246 **Figure 5. Schema of cellular innate immunity processes associated with genes rapidly**

247 **evolving in bats.** Proteins shown in colour are the most significant innate immunity proteins

248 highlighted in this study. Pathogen sensing pathways involving toll-like receptors (TLRs) and

249 *cGAS-STING* can induce expression of type I interferons (IFNs) including IFN-α and IFN-ω. IFN-

250 α genes were lost in the bat ancestor, potentially giving a greater role to IFN-ω. The type I IFNs

251 trigger the induction of IFN-stimulated genes via pathways including *STAT*, which interacts with

252 the positively selected *PARP9*. The IFN-stimulated genes include the positively selected *IFIT2*

253 gene and the immune-related (IR) IFITM genes duplicated in yangochiropteran bats, with both

254 *IFIT2* and IR-IFITM genes playing prominent roles in antiviral defences. The overall schema is

255 based on reviews of type I interferons, *PARP9*, IFIT and IFITM proteins<sup>78,80</sup> and studies on IFITM

256 interactions with RNA viruses<sup>81,82</sup>.

## 257 DNA repair genes and tumor suppressors are positively selected in bats

258 Enhanced DNA repair has been proposed as a mechanism for longevity and cancer resistance in  
259 various mammals including bats<sup>27,83</sup>. We identified six DNA repair-related PSGs and 46 PSGs  
260 that were “cancer-related” (**Table S10**), meaning they were included in either the Tumor  
261 Suppressor Database<sup>84</sup> or the Catalogue Of Somatic Mutations In Cancer<sup>85</sup>. Notably, cancer-  
262 related genes were enriched more than two-fold among PSGs on the bat ancestral branch relative  
263 to a set of mammalian branches (Fisher’s exact test:  $p=9e-3$ , odds ratio=2.2). Among DNA repair  
264 genes, we detected evidence of positive selection in the tumor suppressor-encoding *PALB2* and  
265 in four DNA polymerase-encoding genes (*POLA1*, *POLD1*, *POLK*, and *POLM*). *PALB2* is a crucial  
266 component of the BRCA complex and is required for homologous recombination repair<sup>86–88</sup>. In  
267 bats, it shows three sites under selection as well as seven bat-specific coding indels, including a  
268 21-nucleotide deletion in a *RAD51/BRCA1*-interacting region (Uniprot annotation: Q86YC2).  
269 Despite previous evidence in a long-lived bat<sup>17</sup>, we did not find a signal for selection in *BRCA2*,  
270 although it does contain 14 bat-specific indels (**Data S2**). Similarly, we did not identify the DNA  
271 repair genes *RAD50* and *KU80* (cf. ref.<sup>17</sup>) or the key tumor suppressor-encoding *TP53* as PSGs,  
272 but we did find four sites (codons 35,38,54,97) in *TP53* that are potentially selected in bats as  
273 well as a previously described bat-specific indel in the nuclear localization signal domain<sup>17</sup> (**Figure**  
274 **S7**).

275 While *TP53* did not appear among our PSGs, we did identify genes encoding two other tumor  
276 suppressors that interact with it (**Table 1**): *BIK* and *LATS2*. Both genes showed highly significant  
277 signals of selection in bats in our data set but have not been identified in tests of other mammalian  
278 branches<sup>89,90</sup> or in earlier studies in bats<sup>18,20</sup>. *LATS2* is a kinase that modulates the functions of  
279 tumor suppressors such as *TP53* as well as canonical growth-related Hippo signaling effectors  
280 *YAP/TAZ*<sup>91</sup>. We found that *LATS2* is predominantly under negative selection (bat MRCA dN/dS  
281 =0.23, outgroup mammals dN/dS=0.11) but nevertheless contains 13 selected nonsynonymous  
282 substitutions with evidence of selection in the bat MRCA as well as three bat-specific deletions in  
283 its coding region (**Figure S8, Data S2**). Four of the substitutions fall within known functional  
284 domains of the protein, with a codon 134 glutamic-acid-to-aspartic-acid substitution in the LATS  
285 conserved domain 1 (LCD1) predicted to have an effect on the protein based on SNPeffect<sup>92</sup>.  
286 Previous experimental work in mice has shown that the LCD1 domain is critical for tumor  
287 suppressor activity of *LATS2*<sup>93</sup>. The second tumor suppressor, *BIK*, belongs to the pro-apoptotic  
288 BH3-only family of proteins that are upregulated in response to various stress signals and act as  
289 antagonists of pro-survival proteins<sup>94,95</sup>. *BIK* is regulated by *TP53*<sup>96,97</sup> and contributes to the  
290 apoptotic response induced by chemotherapy treatments<sup>94,98</sup>. The rapid molecular evolution of  
291 *LATS2* and *BIK* suggests that these genes may contribute to bat adaptations in tumor  
292 suppression.

293 The two cancer-related genes displaying the strongest signals of positive selection, *CDH1* and  
294 *CAT* (**Table 1**), also play roles in tumor development. *CDH1* belongs to a family of transmembrane  
295 glycoproteins that mediate cell-cell adhesion and regulate cell growth, making them therapeutic  
296 targets for preventing tumor progression<sup>99</sup>. *CAT* is an antioxidant enzyme that can protect from  
297 ROS-induced stress<sup>100</sup> and plays a role in *TP53*-mediated ROS regulation in response to DNA  
298 damage<sup>101</sup>. Although these functions make *CAT* and *CDH1* intriguing examples of genes that

299 have potentially evolved to enhance bat cancer resistance, previous studies have also found a  
 300 signal for selection in *CAT*<sup>102,103</sup> and *CDH1*<sup>102–104</sup> in other mammals. Experimental validation of  
 301 the bat-specific mutations detected here will thus be important to demonstrate their potential  
 302 adaptive value.

303 **Table 1. Positively selected genes involved in cancer ( $p < 1.0e-3$  with at least one site**  
 304 **selected in the bat MRCA) that showed the strongest statistical significance.** The  $p$ -values  
 305 shown (aBSREL  $p$ -value) are derived from the branch-site likelihood ratio test and adjusted for  
 306 multiple comparisons across branches but not across genes (see text). For contrast, we also  
 307 show  $p$ -values from a similar test (M2a vs. M1a implemented in PAML) applied to a set of  
 308 mammalian branches in studies by ref.<sup>89</sup> and ref.<sup>104</sup>. For ref.<sup>89</sup>, nominal  $p$ -values are shown, with  
 309 nominal  $p < 1.1e-3$  corresponding to FDR < 0.05; for ref.<sup>104</sup>, adjusted  $p$ -values are shown, with  
 310 adjusted  $p < 0.05$ . Missing values are indicated by dashes.

| Symbol         | Name                                     | aBSREL<br>$p$ -value | Sites               | Bat             | Outgroup        | Ref. <sup>34</sup><br>$p$ -value | Ref. <sup>35</sup><br>$p$ -value |
|----------------|------------------------------------------|----------------------|---------------------|-----------------|-----------------|----------------------------------|----------------------------------|
|                |                                          |                      | under<br>selection* | branch<br>dN/dS | branch<br>dN/dS |                                  |                                  |
| <i>CDH1</i>    | <i>cadherin-1</i>                        | 2.0e-6               | 3                   | 0.17            | 0.29            | 1                                | 2.7e-2                           |
| <i>CAT</i>     | <i>catalase</i>                          | 7.0e-6               | 1                   | 0.38            | -               | 1                                | -                                |
| <i>BIK</i>     | <i>BCL2 interacting killer</i>           | 3.7e-5               | 1                   | 1.92            | 0.89            | 1                                | -                                |
| <i>PALB2</i>   | <i>partner and localizer of BRCA2</i>    | 1.8e-4               | 3                   | 0.67            | 0.43            | 1                                | 6.0e-13                          |
| <i>LATS2</i>   | <i>large tumor suppressor kinase 2</i>   | 2.5e-4               | 10                  | 0.23            | 0.11            | -                                | -                                |
| <i>SLC39A4</i> | <i>solute carrier family 39 member 4</i> | 3.8e-4               | 3                   | 0.55            | 0.42            | 0.11                             | -                                |
| <i>SPARCL1</i> | <i>SPARC like 1</i>                      | 4.0e-4               | 4                   | 0.88            | 0.95            | 1                                | -                                |
| <i>PLA2G7</i>  | <i>phospholipase A2 group VII</i>        | 8.5e-4               | 5                   | -               | 1.70            | 1                                | -                                |
| <i>GALR1</i>   | <i>galanin receptor 1</i>                | 8.7e-4               | 1                   | 0.10            | 0.08            | 1                                | -                                |
| <i>CD79A</i>   | <i>CD79a molecule</i>                    | 9.0e-4               | 1                   | -               | 0.37            | 5.4e-9                           | 9.5e-15                          |
| <i>MYO1A</i>   | <i>myosin IA</i>                         | 9.8e-4               | 7                   | 0.94            | 0.14            | 1                                | -                                |

311  
 312 \*Sites with evidence of positive selection in the bat MRCA were identified using site-wise MEME<sup>105</sup>  
 313 analysis with a significance threshold of  $p < 0.1$   
 314

## 315 Discussion

316  
 317 High-quality and complete genome sequences are indispensable for revealing patterns of  
 318 genomic variation within and between species. In this study, we used long-read sequencing to  
 319 assemble the genomes of the bats *A. jamaicensis* and *P. mesoamericanus* and analysed them  
 320 together with 13 additional bat genomes to provide insights into unique bat adaptations. We found  
 321 evidence of genomic adaptation in three key components of the bat innate immune system,  
 322 including pathogen sensing, type I IFN cytokine signalling, and IFN-stimulated antiviral genes

323 (see schema in **Figure 5**). In particular, the loss of IFN- $\alpha$  genes and the potentially increased  
324 reliance of bats on IFN- $\omega$  may play a role in their tolerance of viral infections. The expansion of  
325 antiviral IR-IFITM genes and *PRDM9* in major bat clades may have further contributed to lineage-  
326 specific adaptations. We also found evidence of positive selection in the bat MRCA in 46 cancer-  
327 related genes, suggesting a possible link to the unusually low incidence of cancer in bats.

328 Perhaps our most striking finding, building on earlier comparative genomic studies of the complex  
329 type I IFN locus<sup>12,24</sup>, is that eight type I IFNs were lost in the bat MRCA. Notably, we found that  
330 bats have lost most, or—in the case of *Pipistrellus kuhlii*, *M. myotis* and *P. mesoamericanus*—all  
331 of their IFN- $\alpha$  genes, making their type I IFN locus particularly distinct among mammals. The  
332 overall contraction of the type I IFN locus in bats has been hypothesized to allow a smaller number  
333 of constitutively expressed IFN- $\alpha$  genes to perform the functions of the 13 IFN- $\alpha$  genes in  
334 humans<sup>24</sup>. The constitutive expression and rapid evolution of bat IFNs may also partly result from  
335 dampened inflammation caused by evolutionary changes to inflammasome genes such as *AIM2*,  
336 *caspase-1* and *IL-1 $\beta$* <sup>106</sup>, because inflammasomes may negatively regulate type I IFN sensors<sup>107</sup>.  
337 Indeed, the regulation of type I IFNs in bats also appears to have evolved adaptively, as positive  
338 selection of the key transcription factor *IRF3* in bats was previously shown to enhance antiviral  
339 responses via type I IFN activation<sup>108</sup>. However, our results suggest that constitutive expression  
340 of IFN- $\alpha$  is not common to all bats, in line with expression analyses in *R. aegyptiacus*<sup>12</sup>. We  
341 hypothesize that by relying on the potentially more potent IFN- $\omega$  rather than IFN- $\alpha$ , bats may  
342 further enhance their antiviral responses. Although further work will be needed to demonstrate a  
343 functional shift to IFN- $\omega$ , the lack of any IFN- $\alpha$  genes in three bat species strongly suggests a shift  
344 has occurred at least in these cases. It is possible that an enhanced antiviral response owing to  
345 IFN- $\omega$  helps to compensate for an overall dampened inflammatory response in bats. If these  
346 properties of IFN- $\omega$  can be established, they may open the door to new therapeutic uses of IFN-  
347  $\omega$ <sup>109,110</sup>.

348 In addition, our findings suggest that, compared to other parts of the mammalian phylogeny, the  
349 lineage leading to bats is enriched for positively selected cancer-related genes. Rapid evolution  
350 of DNA repair genes as well as tumor suppressors has been proposed as a mechanism for cancer  
351 resistance in other long-lived mammals such as whales<sup>111</sup>. Intriguingly, it was previously  
352 hypothesized that selection of cancer resistance components such DNA repair genes in bats  
353 resulted from a need to reduce the negative effects of ROS generated as a consequence of  
354 flight<sup>17</sup>. This suggestion appears consistent with our findings of positively selected ROS regulators  
355 and DNA repair genes. The evolution of cancer resistance in bats may also be associated with  
356 adaptations in the bat immune system. There is substantial overlap of genes related to cancer  
357 and the immune system<sup>112</sup>, with immune-related genes being known to play a role in cancer  
358 surveillance<sup>113</sup> and tumor suppression<sup>114–116</sup>. Specific examples include immune-related genes  
359 that are rapidly evolving in bats. For example, ROS plays an important role in *NLRP3*  
360 inflammasome activation<sup>117,118</sup>, *IFIT2* plays a role in apoptosis and cancer progression<sup>119</sup> and IFNs  
361 contribute to anti-tumor activity<sup>120,121</sup>. Positive selection in such genes may be driven by fitness  
362 trade-offs between roles in immunity and cancer<sup>112</sup>. For example, inhibition of inflammation can  
363 promote longevity<sup>122,123</sup> and suppress tumor growth<sup>124,125</sup>. Comparative analyses of gene  
364 expression across mammals and experimental validation may help resolve the different roles of  
365 ROS regulation, DNA repair, inflammation and immunity in cancer resistance. We anticipate that



366 our initial evolutionary findings and the novel genomic resources we have made available  
367 (including a genome browser: <http://compgen.cshl.edu/bat/>) will encourage and facilitate further  
368 genomic research in bats, particularly as models that can lead to new strategies for addressing  
369 major challenges to human health such as COVID-19 and cancer.

## 370 Acknowledgements

371 This research was supported, in part, by US National Institutes of Health (NIH) grants P30-  
372 CA045508 (to D. Tuveson and colleagues) and R35-GM127070 (to A. Siepel), and by the Simons  
373 Center for Quantitative Biology. Computational work was performed with assistance from NIH  
374 Grant S10OD028632-01, and the genome browser was set up with help from Ritika Ramani. We  
375 thank the CSHL Cancer Center and Director David Tuveson for support and encouragement. We  
376 would further like to acknowledge funding support from the CSHL/Northwell Health Affiliation for  
377 purchase of the ONT PromethION sequencer used in this study. We also thank Semir Beyaz for  
378 helpful comments on the manuscript. Finally, we thank Brock Fenton, Neil Duncan, the staff at  
379 the Lamanai Field Research Center, and many other colleagues who assisted with the fieldwork  
380 necessary for this study. The content is solely the responsibility of the authors and does not  
381 necessarily represent the official views of the NIH or other funding sources.

382

## 383 Data availability

384

385 All raw sequencing data and final genome assemblies have been made available via NCBI  
386 (PRJNA751559). Gene annotations can be downloaded or viewed as UCSC genome browser  
387 tracks from our laboratory website (<http://compgen.cshl.edu/bat/>). Supplementary tables and data  
388 are available via FigShare (<https://doi.org/10.6084/m9.figshare.15223014.v1>).

## 389 Materials and methods

390

### 391 Sample background and acquisition

392

393 Fresh liver samples from a single individual of *A. jamaicensis* (AMNH 279493, male) and one *P.*  
394 *mesoamericanus* (AMNH 279536, male) were collected by NBS in April 2017 at the Lamanai  
395 Archaeological Reserve in Orange Walk District, Belize (17.75117°N, 88.65446°W). Sampling  
396 followed best practices for humane capture, handling, and euthanasia of live mammals outlined  
397 by the American Society of Mammalogists<sup>126</sup>. All work was conducted with permission of the  
398 Belize Forest Department under permit number WL/2/1/17(19) with IACUC approval from the  
399 American Museum of Natural History (AMNH IACUC-20170403) and University of Georgia (A2014  
400 04-016-Y3-A5). Bats were captured in ground-level mist nets and placed in individual cloth bags  
401 for transport to the Lamanai Field Research Center. After identification, the bats were euthanized  
402 using isoflurane, and the liver was removed immediately after death. Samples were placed in  
403 multiple individual 2ml cryotubes and flash-frozen by placement in a liquid nitrogen dry shipper.  
404 The cold chain was maintained through shipment to the AMNH, storage in the AMNH Ambrose  
405 Monell Cryo Collection, and subsequent sample processing and transfers.

### 406 Genome sequencing and assembly

407

408 Approximately 40 mg of liver tissue from each bat was received at CSHL and stored at -80C. The  
409 liver samples were crushed with a micro pestle and mixed with 10 ml of TLB buffer and 50µl of  
410 RNase A immediately before use. After a one-hour incubation at 37C, 50 µl of Proteinase K was  
411 added, followed by incubation at 50C for 3 hours with hourly inversion mixing. After addition of  
412 10ml of a phenol chloroform / isoamyl alcohol mixture, each sample was rocked for 10 minutes  
413 and then centrifuged at 4500RPM for 10 minutes. The top aqueous layer was retained and an  
414 equal volume of chloroform / isoamyl alcohol was added, and rocking and centrifugation was  
415 repeated as above. The top layer was transferred to a fresh tube with 4ml of 5M ammonium  
416 acetate. Following the addition of 30ml of ice cold 100% ethanol, the sample was rocked for 10  
417 minutes. The visible DNA was then extracted with a glass pipet and placed in a 1.5ml tube. The  
418 sample was washed once with 100% ethanol and centrifuged for 5 minutes at 10,000 RPM. The  
419 ethanol was removed and any remaining ethanol was evaporated on a 37C heat block for 10  
420 minutes. The final DNA was resuspended in 10mM Tris HCl pH 8.5 and stored overnight at 4C.

421

422 DNA was then sheared to ~50-75kb using a Diagnode Megarupter following manufacturer's  
423 recommendations. DNA was further enriched for long fragments via the Circulomics small read  
424 eliminator XL kit, which iteratively degrades short fragments. DNA was prepared for Nanopore  
425 sequencing using the ONT 1D sequencing by ligation kit (SQK-LSK109). Briefly, 1-1.5ug of  
426 fragmented DNA was repaired with the NEB FFPE repair kit, followed by end repair and A-tailing  
427 with the NEB Ultra II end-prep kit. After an Ampure clean-up step, prepared fragments were  
428 ligated to ONT specific adapters via the NEB blunt/TA master mix kit. The library underwent a  
429 final clean-up and was loaded onto a PromethION PRO0002 flowcell per manufacturer's  
430 instructions. The flowcells were sequenced with standard parameters for 3 days. Basecalling was

431 performed in real time with Guppy 3.2. Nanopore reads were filtered for minimum length of 10  
432 and minimum 85% accuracy using filtLong (<http://github.com/rrwick/Filtlong>). Illumina short read  
433 libraries were prepared from the same tissue as above with the Illumina TruSeq DNA kit, targeting  
434 a 550bp insert size with PCR enrichment.

435  
436 Libraries were sequenced at the New York Genome Center, on a NovaSeq S4 flowcell in paired  
437 end 150bp format to ~30x genome coverage. Reads were assembled using flye 2.8.3<sup>33</sup>, after  
438 evaluation of additional assemblies generated with wtbg2<sup>127</sup>, NextDenovo  
439 (<https://github.com/Nextomics/NextDenovo>) and Shasta<sup>128</sup> (**Table S12**). Assembly was followed  
440 by long-read polishing using minimap 2.17<sup>129</sup> for alignment and PEPPER 1.0<sup>34</sup> for polishing. Next,  
441 bwa-mem 0.7.17-r1188<sup>130</sup> was used to align the Illumina short-read data to the long-read polished  
442 assembly, and short-read polishing was carried out with POLCA<sup>35</sup>. To compare assembly  
443 contiguity, error rates and completeness, assemblies were then assessed using Merqury 1.0<sup>131</sup>,  
444 as well as with Benchmarking Sets of Universal Single-Copy Orthologs 4.0.5 (BUSCO)<sup>132</sup> for  
445 mammals (odb9). Additionally, we used python scripts to compute the cumulative sum of contigs  
446 length (N(X) length) versus the cumulative sum of N(X)% of the total genome. Further assembly  
447 statistics were calculated using BBTools 38.86 (<http://sourceforge.net/projects/bbmap/>).  
448 Duplicated haplotypes in the assemblies were purged using purge\_dups 1.2.3<sup>133</sup>.

449  
450 The assemblies were aligned to human, mouse, and pig assemblies as well as to four bat  
451 assemblies (*M. myotis*, *P. discolor*, *D. rotundus*, and *R. ferrumequinum*) using Cactus<sup>134</sup>. Bat-  
452 specific small indels (<1kb) were called relative to the human reference from the multiple  
453 alignment using a custom python script. Indels were called in alignment blocks with at least 10  
454 bases and seven species aligned including at least 2 non-bat mammals. Only fixed indels present  
455 in all bats or all bats but one were retained. Bat-specific insertions and deletions relative to the  
456 human reference were distinguished based on the sequence of the pig outgroup.

## 457 Gene annotation

458 Public RNA-seq data from SRA were downloaded for *A. jamaicensis* and *Pteronotus parnelli*  
459 (**Table S13**) and proteins for human (GCF\_000001405.39), mouse (GCF\_000001635.26), and  
460 seven bat species (*Myotis brandtii*, GCF\_000412655.1; *M. davidii*, GCF\_000327345.1; *M.*  
461 *lucifugus*, GCF\_000147115.1; *Phyllostomus discolor*, GCF\_004126475.1; *Pteropus alecto*,  
462 GCF\_000325575.1; *Rhinolophus ferrumequinum*, GCF\_004115265.1; *R. aegyptiacus*,  
463 GCF\_001466805.2) were downloaded from RefSeq. RNA-seq reads were aligned to the new  
464 reference genomes using HISAT 2.2.0<sup>135</sup> with the parameters “--no-mixed --no-discordant --  
465 downstream-transcriptome-assembly” and transcripts were assembled using StringTie 2.1.1<sup>136</sup>.  
466 To reduce potential loss of transcripts due to limitations of short-read alignment, transcriptomes  
467 were also *de novo* assembled with Trinity 2.9.1<sup>137</sup>. PASA 2.4.1<sup>138</sup> was used to generate the final  
468 set of transcripts based on alignment with GMAP<sup>139</sup> and BLAT<sup>140</sup> using minimum thresholds of  
469 90% of transcript length aligned at 90% identity. GeMoMa was used to project gene annotations  
470 from six bat assemblies<sup>18</sup> to the genomes of *A. jamaicensis* and *P. mesoamericanus*.  
471 Transdecoder was used to predict coding sequences within the assembled transcripts<sup>141</sup>. We  
472 used the transcripts and proteins sequences as evidence for the MAKER3 annotation pipeline<sup>142</sup>  
473 with the *ab initio* gene predictors SNAP 2006.07.28<sup>143</sup> and Augustus 3.3.3<sup>144</sup>. GlimmerHMM<sup>145</sup>

474 and GeneMark 4.68<sup>146</sup> were used to generate further *ab initio* gene predictions. Final annotations  
475 were generated with Evidence Modeler<sup>147</sup>. To reduce the number of potentially missing genes  
476 caused by lack of protein and RNA-seq evidence, we used intact TOGA  
477 (<https://github.com/hillerlab/TOGA>) gene projections from the recently assembled *A. jamaicensis*  
478 (GCF\_014825515.1) to add gene annotations that did not intersect the Evidence Modeler  
479 annotations. The completeness of the final predicted protein set was assessed using BUSCO.

## 480 Repeat analysis

481 Repeat masking was carried out using an iterative masking and *de novo* repeat detection  
482 approach. After masking repeats with Repeatmasker 4.0.9<sup>148</sup> and the combined RepBase-  
483 20181026 and Dfam-3.1 repeat databases, novel repeats were detected in the masked genomes  
484 with RepeatModeler 2.0.1. The consensus *de novo* repeats longer than 100 bp were then  
485 concatenated with a vertebrate repeat library including novel bat repeats<sup>18</sup> and clustered with CD-  
486 HIT 4.81<sup>149</sup>. All clustered novel sequences with >80% sequence similarity across >80% of the  
487 length of the clustered sequences were excluded<sup>150</sup>. Novel repeats were then aligned to the nt  
488 database using BLAST and all repeats matching annotated transcripts were removed. A further  
489 BLAST analysis was used to exclude repeats with fewer than 10 alignments to the reference  
490 genome from which they were derived. Transposable elements were classified and assigned  
491 families using TEclass<sup>151</sup> and DeepTE<sup>152</sup>. The consensus *de novo* repeats were then  
492 concatenated with the vertebrate repeat library and a final masking of the genome was carried  
493 out with RepeatMasker using the 'sensitive' setting. The recently diverged repeat landscape was  
494 analysed using the RepeatMasker script calcDivergenceFromAlign.pl with correction of  
495 substitution rates based on the Kimura 2-Parameter model. Transposons were considered  
496 recently diverged at 7% divergence from the consensus<sup>18</sup>, which approximates an insertion <30  
497 mya, assuming a mammalian substitution rate of  $2.2 \times 10^{-9}$ <sup>153</sup>. To allow comparison of the repeat  
498 landscape within the Noctilionoidea bat clade, the same repeat masking approach was carried  
499 out for several closely related bats (*D. rotundus*, *P. discolor*, *S. hondurensis* and *M. myotis*).

## 500 Mining of endogenous viral elements

501 To scan for endogenous viral elements that might provide evidence of past infections, we aligned  
502 the complete RVDB-prot viral protein database<sup>154</sup> to our genomes using BLAST with an e-value  
503 threshold of 1e-5. Alignments intersecting coding sequence and those shorter than 100aa were  
504 excluded. Non-retroviral matches were aligned to the NR protein database using blastx with an  
505 e-value threshold of 1e-5 and TaxonKit 0.6.0<sup>155</sup> was used to retain sequences with a best match  
506 to a viral lineage.

## 507 Identification of orthologous gene groups

508 We analysed bat genes for lineage-specific signals of positive selection and gene duplications  
509 based on clustered ortholog groups. Coding sequences for 13 bats and five outgroup mammals  
510 (human, mouse, dog, pig, and horse) were downloaded from RefSeq and the Hiller lab  
511 (<https://bds.mpi-cbg.de/hillerlab/Bat1KPilotProject/>). Annotated open reading frames that did not  
512 show a nucleotide number that was a multiple of three or that contained internal stop codons were

513 discarded. The longest isoform for each gene was retained. All proteins were clustered with the  
514 proteins of our bats using OrthoFinder 2.3.11<sup>156</sup>. A set of single copy orthologs was extracted from  
515 the OrthoFinder results, retaining orthologs with at least 12 bat species and three mammalian  
516 outgroups. Genes were then aligned using PRANK v.170427<sup>157</sup> with the species tree provided to  
517 guide the alignment. Cancer-associated ortholog clusters were identified based on the databases  
518 TSG<sup>84</sup> and COSMIC<sup>5</sup>.

## 519 Gene family expansion analysis

520 Alignments of 3,632 single copy genes that were present in all species were concatenated into a  
521 single alignment, which was divided into three partitions corresponding to codon positions. A  
522 maximum-likelihood phylogeny was inferred using RAxML 8.2.12<sup>158</sup> rapid bootstrapping under the  
523 GTR+G+I model with 100 bootstraps. A dated phylogeny was then generated using MCMCtree  
524 in PAML. Node ages were calibrated based on TimeTree<sup>159</sup> ages for Euarchontoglires, bats,  
525 Yangochiroptera and Yinpterochiroptera. Convergence was assessed based on analysis of two  
526 replicate runs with tracer<sup>160</sup>. The dated phylogeny was used to calculate gene family expansions  
527 and contractions with CAFE 4.21<sup>38</sup> based on a  $p$ -value threshold of 0.05. Orthofinder orthogroups  
528 were collapsed into 7,405 PANTHER gene families based on BiomaRt<sup>161</sup> data and 1,448  
529 unassigned Orthogroups. For each of 19,935 orthogroups, a representative gene was selected to  
530 obtain a PANTHER assignment. For 2,466 orthogroups, where no human or mouse gene was  
531 represented, we selected a gene from a different species for sequence-based annotation using  
532 interproscan and eggno3. As CAFE assumes all genes were present in the common ancestor of  
533 all analysed species, orthogroups represented in less than two bats and two outgroup mammals  
534 were excluded. Final copy numbers and genomic coordinates for IFITM (**Table S14**) and type I  
535 IFN (**Table S15**) genes were visualised using genoPlotR<sup>162</sup>. For the analysis of the *PRDM9*  
536 expansion in phyllostomids, recently generated short-read assemblies of *Sturnira hondurensis*  
537 (GCA\_014824575.2) and *A. jamaicensis* (GCA\_014825515.1) were included in the phylogenetic  
538 analysis (**Figure S6**) but not the CAFE analysis. Sequences and RAxML phylogenies are  
539 provided for IFITM, IFN, and *PRDM9* orthogroups (**Data S3**).

## 540 Positive selection analysis

541 We aimed to determine whether each gene was positively selected in one or more of three groups:  
542 the bat MRCA, *P. mesoamericanus* and *A. jamaicensis*. We also detected positive selection using  
543 the adaptive branch-site random effects model (aBSREL) method implemented in HyPhy 2.5.12<sup>55</sup>.  
544 A likelihood ratio test was used to determine whether a lineage-specific group of codons in the  
545 alignment is experiencing significant positive selection. Unlike the branch-site tests implemented  
546 in PAML<sup>163</sup>, aBSREL allows rate variation among the background branches, which can reduce  
547 false positive errors<sup>55</sup>. In addition, we also used PAML 4.9 to apply Test 2, a branch-site test of  
548 positive selection. This test compares the alternative model where some branches are under  
549 positive selection and thus exhibit sites with  $\omega > 1$  with the corresponding null model where omega  
550 is fixed as 1. We computed  $p$ -values according to a  $\chi^2$  distribution with one degree of freedom.  
551 The  $p$ -values calculated by PAML and HyPhy were adjusted for multiple testing of three branches  
552 per gene using the Benjamini-Hochberg method for controlling false discovery rate (FDR)  
553 implemented in base R. We also corrected for multiple testing of all genes using FDR (**Table**

554 **S10**). We used the maximum-likelihood species tree inferred using 3,048 orthologs (see **Methods**  
555 section ‘Gene family expansion analysis’) to provide the topology for the positive selection scans.  
556 In this tree, bats are the sister group to Fereuungulata (Cetartiodactyla, Perissodactyla, Carnivora,  
557 and Pholidota)<sup>18</sup>. Relationships within Fereuungulata remain challenging to resolve<sup>18,164</sup> and here  
558 we followed the TimeTree<sup>159</sup> topology that places Perissodactyla+Carnivora as sister to  
559 Cetartiodactyla. For comparison with a previous scan for positive selection on all branches of a  
560 mammalian phylogeny (including human, chimpanzee, macaque, mouse, rat, and dog), we used  
561 the set of 8,594 genes that were tested for positive selection using PAML in both this study and  
562 in ref<sup>89</sup>. MEME<sup>105</sup> analysis was used to identify sites potentially under selection in the bat MRCA  
563 with a significance threshold of  $p < 0.1$ . Alignment of genes positively selected in the bat MRCA  
564 are provided in **Data S4**.

565

## 566 Gene ontology enrichment

567

568 GO, Reactome and KEGG annotations for genes were obtained via BiomaRt. A total of 18,452  
569 orthogroups were annotated with at least one feature and 17,840 were assigned GO features.  
570 We carried out enrichment analysis on groups of genes that were positively selected or that  
571 showed gene family expansions. Enrichment analysis was performed using topGO 2.44<sup>165</sup>, with  
572 the elim algorithm and Fisher’s exact test ( $p < 0.01$ ). All genes tested for selection were used as  
573 the background. The elim algorithm is a conservative approach that processes the GO graph from  
574 the bottom up, to eliminate higher order terms that would otherwise appear enriched due to  
575 correlation with more specific terms. GO terms with fewer than 10 genes annotated were  
576 excluded.

## 577 Supplementary tables

578

579 Supplementary tables are available online (<https://doi.org/10.6084/m9.figshare.15223014.v1>).

580 **Table S1.** GenBank assemblies for the taxonomic order Chiroptera (bats). List generated on 4th  
581 April 2021.

582 **Table S2.** Comparison of assembly statistics of the unscaffolded genomes of *Artibeus*  
583 *jamaicensis* and *Pteronotus mesoamericanus* with five scaffolded bat genomes assembled using  
584 a range of technologies.

585 **Table S3.** Recently diverged repetitive elements in the genomes of five noctilionoid bats and the  
586 related bat *Myotis myotis*. Repeats were detected and Kimura divergence from the consensus  
587 was calculated using RepeatMasker with a custom bat repeat database (available from  
588 <http://compgen.cshl.edu/bat/>).

589 **Table S4.** Non-retroviral endogenous viral elements (EVEs) detected in the genomes of *Artibeus*  
590 *jamaicensis* and *Pteronotus mesoamericanus*. EVEs were identified based on tblastn alignments  
591 of the reference viral database (<https://rvdb-prot.pasteur.fr/>) to the genomes, followed by filtering  
592 of sequences <100aa and retroviral sequences. Bat sequences with a best hit to a viral protein or  
593 EVE in the NCBI nr protein database using blastp were retained.

594 **Table S5.** Significantly expanded or contracted gene families in the bat lineage detected using  
595 CAFE. Ortholog clusters were assigned to PANTHER gene families based on human protein  
596 annotations from biomaRt and gene family descriptions were obtained from pantherdb.org. CAFE  
597 results for the Yangochiroptera clade and for *Artibeus jamaicensis* and *Pteronotus*  
598 *mesoamericanus* are also shown.

599 **Table S6.** Fisher's exact test using a 2-by-2 contingency table for interferon- $\alpha$  and interferon- $\omega$   
600 copy number in a set of outgroup mammals and in individual bat species.

601 **Table S7.** Significantly selected sites in the genes IFITM3, IFIT2 and STING in the bat lineage  
602 based on MEME analysis. Codon positions are based on the human reference sequence. Protein  
603 mutagenesis and domain information was extracted from uniprot.org.

604 **Table S8.** Significantly expanded or contracted gene families in the bat subclade Yangochiroptera  
605 and in the species *Artibeus jamaicensis* and *Pteronotus mesoamericanus* detected using CAFE.  
606 Ortholog clusters were assigned to PANTHER gene families based on human protein annotations  
607 from biomaRt and gene family descriptions were obtained from pantherdb.org.

608 **Table S9.** Domain analysis of all protein sequences in the *PRDM9* ortholog cluster for seventeen  
609 bats and four other mammals. Protein sequences were analysed using PfamScan  
610 (<https://www.ebi.ac.uk/Tools/pfa/pfamscan/>). There is no *PRDM9* ortholog present in the dog.  
611 Protein IDs for genomes not generated in this study are based on the GenBank annotations and  
612 annotations from <https://bds.mpi-cbg.de/hillerlab/Bat1KPilotProject/>.

613 **Table S10.** Positively selected single copy orthologs in bats (order Chiroptera). Gene annotations  
614 are based on biomaRt data for the human protein, or, when not available, the protein of mouse  
615 or another mammal. Published p-values for the same genes were extracted based on publicly  
616 available data from eight studies. Branch-site likelihood ratio test p-values are shown for aBSREL  
617 and PAML M2a tests for the bat lineage as well as for *Artibeus jamaicensis* (*Ajamaicensis*) and

618 *Pteronotus mesoamericanus* (Pmesoericanus). Uncorrected  $p$ -values are shown as well as  $p$ -  
619 values adjusted with FDR for multiple tested branches and for multiple tested branches and  
620 genes.

621 **Table S11.** TopGO gene ontology enrichment analysis of positively selected genes in the bat  
622 ancestor. The 'elim' algorithm was used and GO enrichments with  $p < 0.01$  and  $\geq 10$  annotated  
623 genes were retained for further analysis.

624 **Table S12.** Comparison of assembly and polishing statistics using different approaches. Polished  
625 assemblies were assessed using BUSCO v4 (Mammalia odb9) in genome mode and Merqury  
626 v1.3. RNAseq reads were aligned using hisat2.

627 **Table S13.** SRA accession numbers for RNAseq data used in the annotation of *Artibeus*  
628 *jamaicensis* and *Pteronotus mesoamericanus*.

629 **Table S14.** Genomic coordinates of the genes at the IFITM locus in nine bats and five other  
630 mammals. Coordinates for genomes not generated in this study are based on GenBank  
631 annotations.

632 **Table S15.** Genomic coordinates of the genes at the type I interferon locus in 10 bats and five  
633 other mammals. Coordinates for genomes not generated in this study are based on GenBank  
634 annotations.

635

## 636 Supplementary data

637

638 Supplementary data are available online (<https://doi.org/10.6084/m9.figshare.15223014.v1>).

639 **Data S1.** Positive selection analysis of orthogroups in bats (order Chiroptera). All orthogroup  
640 clusters generated by Orthofinder are shown, including multicopy orthogroups and lineage-  
641 specific orthogroups, but only single-copy orthogroups were analysed for positive selection. Gene  
642 annotations are based on biomaRt data for the human protein, or, when not available, the protein  
643 of mouse or another mammal. Published  $p$ -values for the same genes were extracted based on  
644 publicly available data from eight studies. Branch-site likelihood ratio test  $p$ -values are shown for  
645 aBSREL and PAML M2a tests for the bat lineage as well as for *Artibeus jamaicensis*  
646 (*Ajamaicensis*) and *Pteronotus mesoamericanus* (Pmesoericanus). Uncorrected  $p$ -values are  
647 shown as well as  $p$ -values adjusted with FDR for multiple tested branches and for multiple tested  
648 branches and genes.

649 **Data S2.** Gene-associated microindels detected in five or more bats from a Cactus multiple  
650 alignment of six bats with human, mouse and pig. The bats included in the alignment were *D.*  
651 *rotundus*, *A. jamaicensis*, *P. mesoamericanus*, *P. discolor*, *M. myotis* and *R. ferrumequinum*. Only  
652 indels occurring within coding sequences, within 1 kilobase of coding sequence or within the core  
653 promoter (based on human core promoters downloaded from <https://epd.epfl.ch//index.php>) were  
654 included. Coordinates are based on the human hg38 assembly and coordinates of aligned  
655 sequence from *A. jamaicensis* and *P. mesoamericanus* are also provided.

656 **Data S3.** Coding sequences and RAxML phylogenies for the type I interferon, interferon-induced  
657 transmembrane and PRDM9 orthogroups.



658 **Data S4.** Unfiltered PRANK alignments of all single-copy orthologs where positive selection was  
659 detected on the branch leading to the bat most recent common ancestor.

660

661 **Supplementary figures**

662

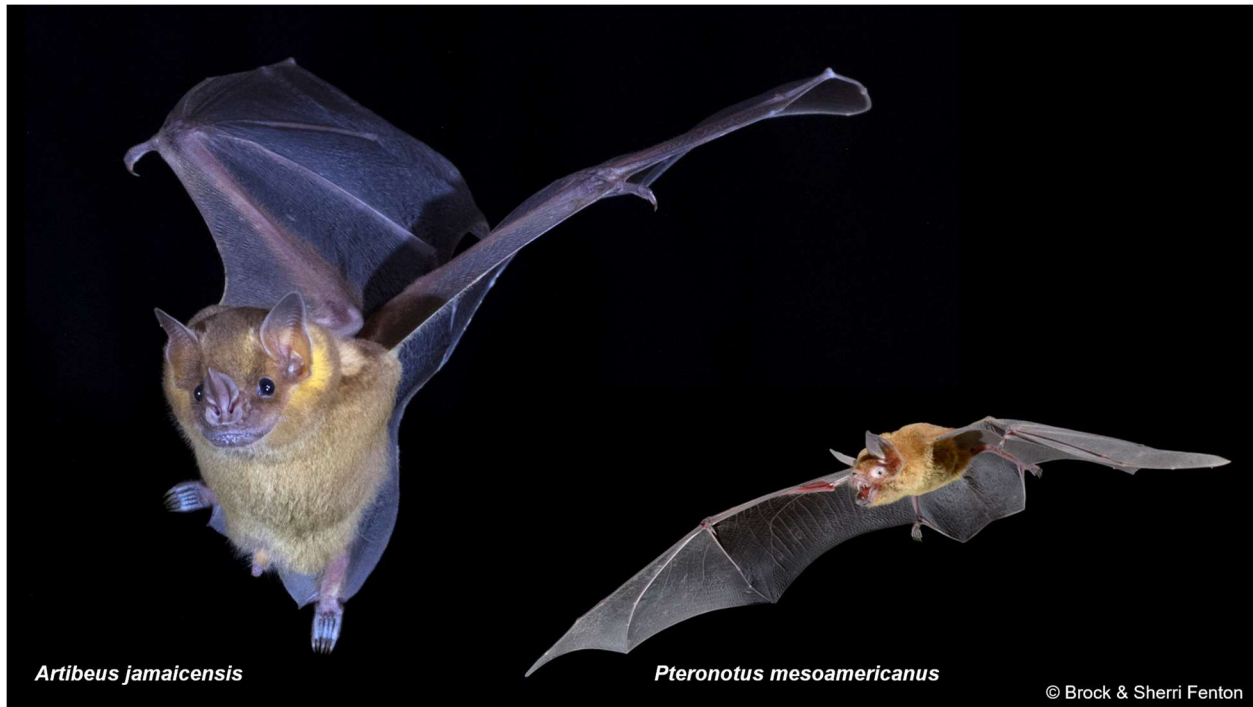

663

664

665 **Figure S1. Photographs of the bats *A. jamaicensis* and *P. mesoamericanus* sequenced in**  
666 **this study. Photographs were provided by Brock & Sherri Fenton.**

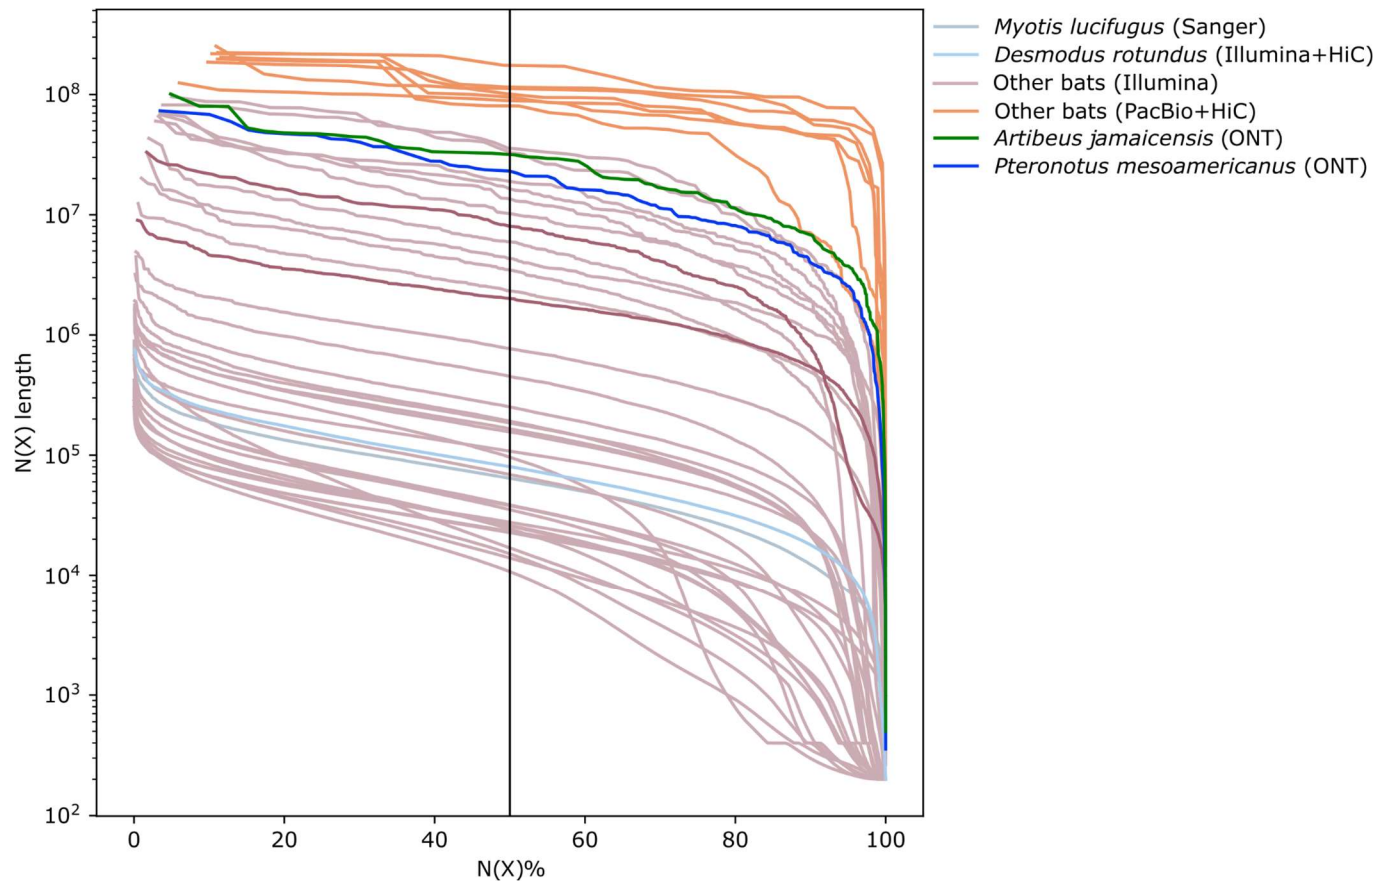

667  
668  
669  
670  
671  
672

**Figure S2. Cumulative sum of the length of the ordered contigs versus the cumulative sum of the total proportion of the genome.** The vertical black line indicates the N50 metric. The set of 'Other bats (PacBio+HiC)' is based on ref<sup>18</sup> and 'Other bats (Illumina)' are a different set of publicly available bat genomes downloaded from GenBank (see **Table S1** for all GenBank bat assemblies).

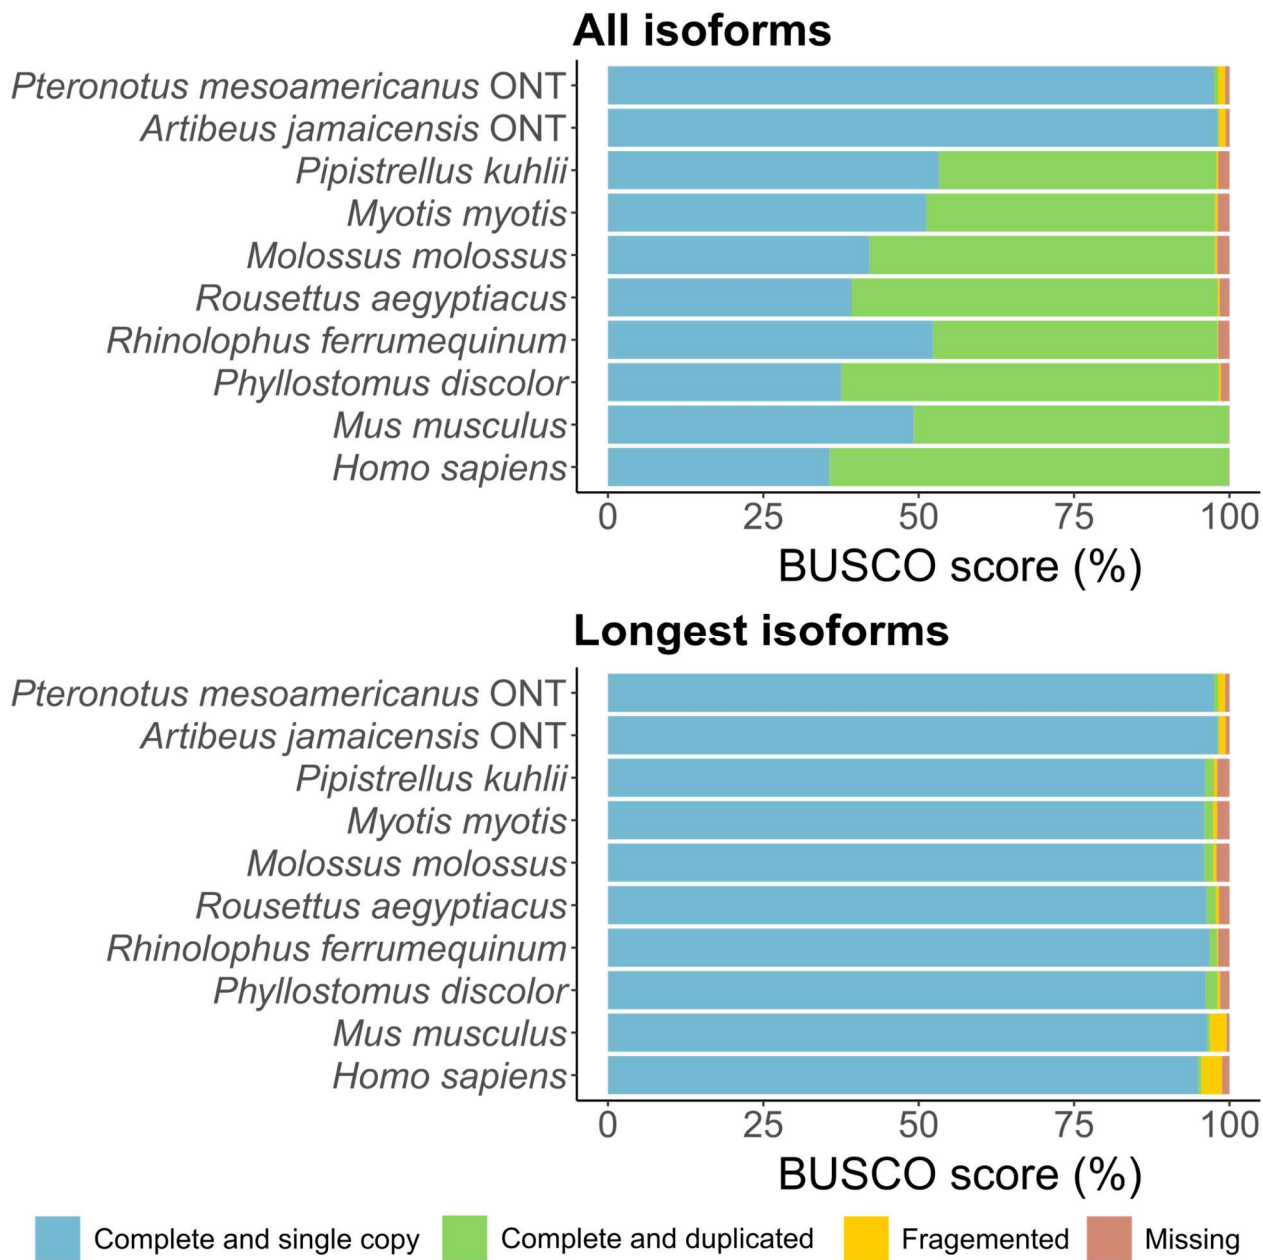

675 **Figure S3. Protein-based BUSCO v4 analysis of eight bats as well as human and mouse.**  
676 The mammalian BUSCO set (odb9) was used. Proteins for bat species not sequenced in this  
677 study are based on annotations downloaded from [https://bds.mpi-](https://bds.mpi-cbg.de/hillerlab/Bat1KPilotProject/)  
678 [cbg.de/hillerlab/Bat1KPilotProject/](https://bds.mpi-cbg.de/hillerlab/Bat1KPilotProject/).

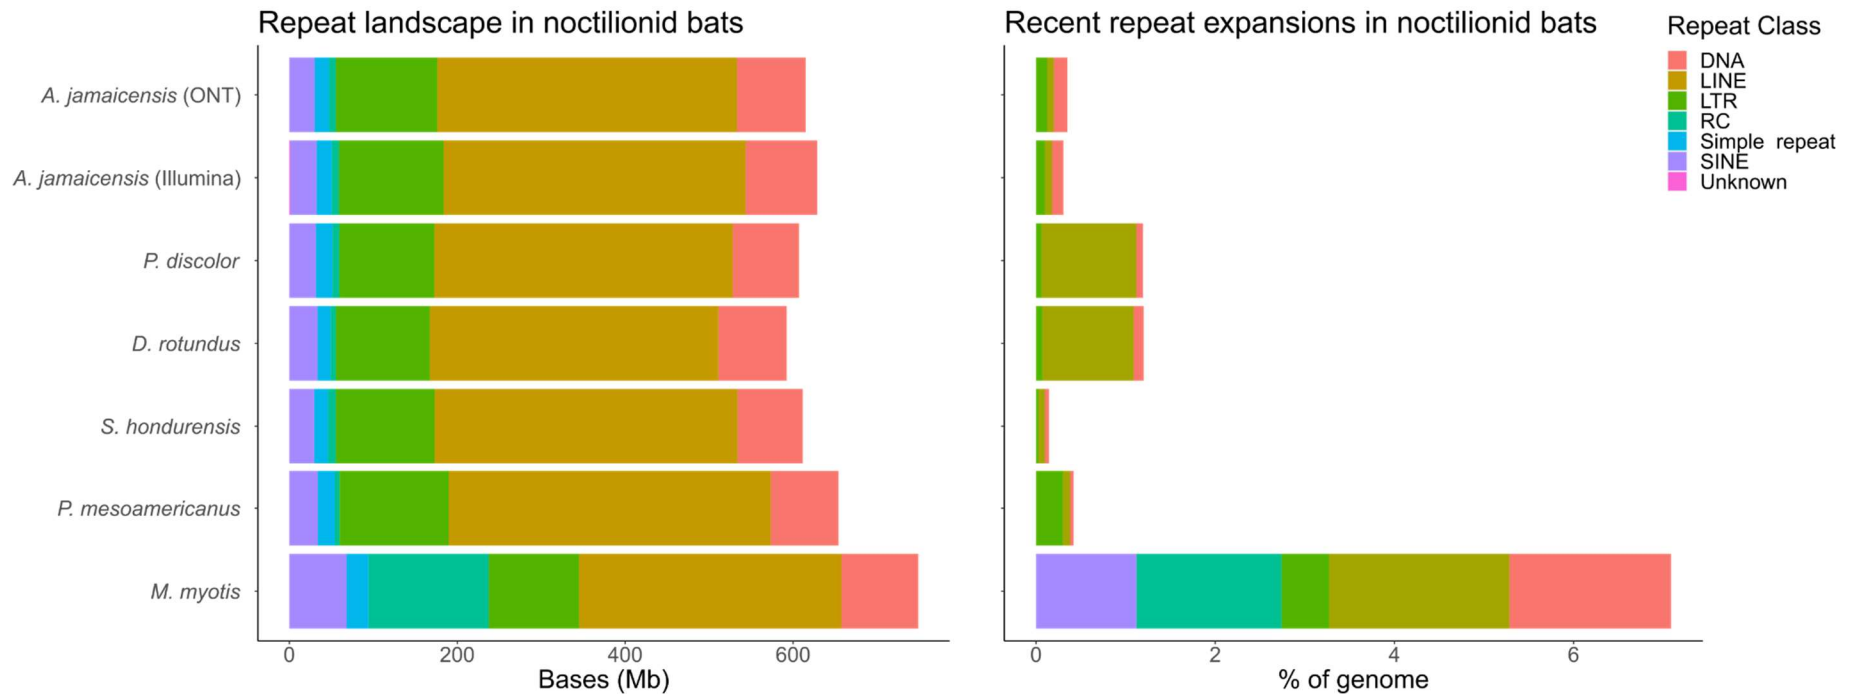

679

680 **Figure S4. RepeatMasker analysis of repeat classes in noctilionoid genomes.** Noctilionoids exhibit a homogeneous landscape of  
 681 repeat classes that almost completely lacks the rolling circle (RC) repeats prevalent in *M. myotis*. Long interspersed nuclear elements  
 682 (LINEs) make up the largest repeat class in all bats. Recent repeat expansion make up less than 2% of the genome in all noctilionoids.  
 683 A list of the recently expanded repeats is provided in **Table S3**.

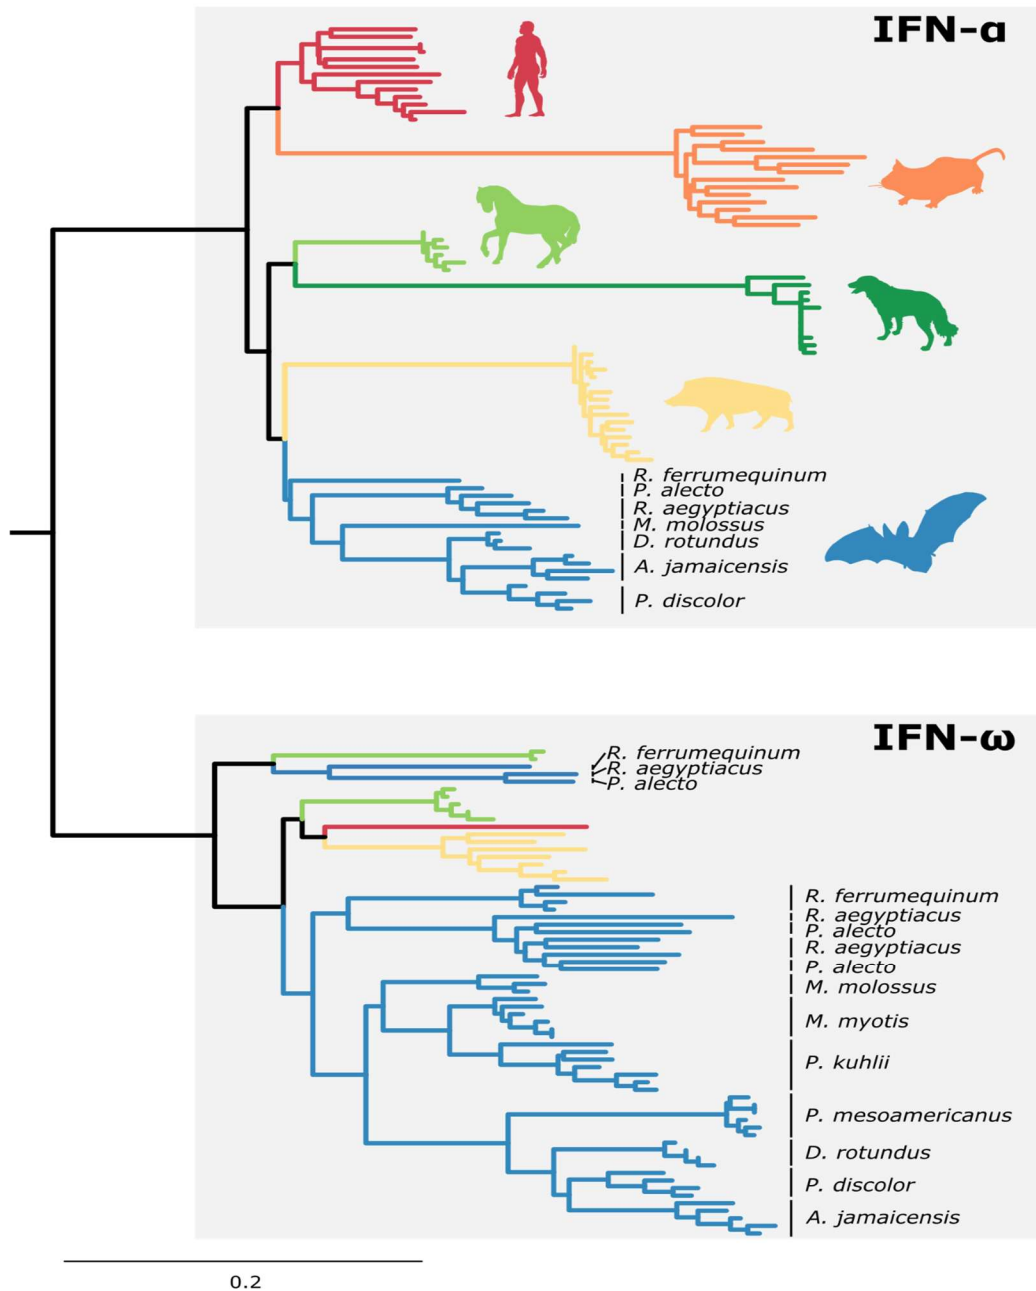

684 **Figure S5. Maximum-likelihood phylogeny of mammalian IFN- $\alpha$  and IFN- $\omega$  genes showing**  
685 **the shift in the ratio of IFN- $\alpha$  to IFN- $\omega$  copy number in bats (shown in blue) compared to**  
686 **other mammals.** The phylogeny was inferred with RAxML under a GTRGAMMA model using  
687 alignments partitioned by codon sites. IFN- $\omega$  genes are not present in the dog or mouse. Although  
688 the topology mostly reflects the expected phylogenetic relationships between species, the tree is  
689 intended to show copy number variation in IFN- $\alpha$  and IFN- $\omega$ , and it should be noted that internal  
690 branches within each ortholog cluster are not robustly supported. The sequence and topology are  
691 provided in **Data S3**.

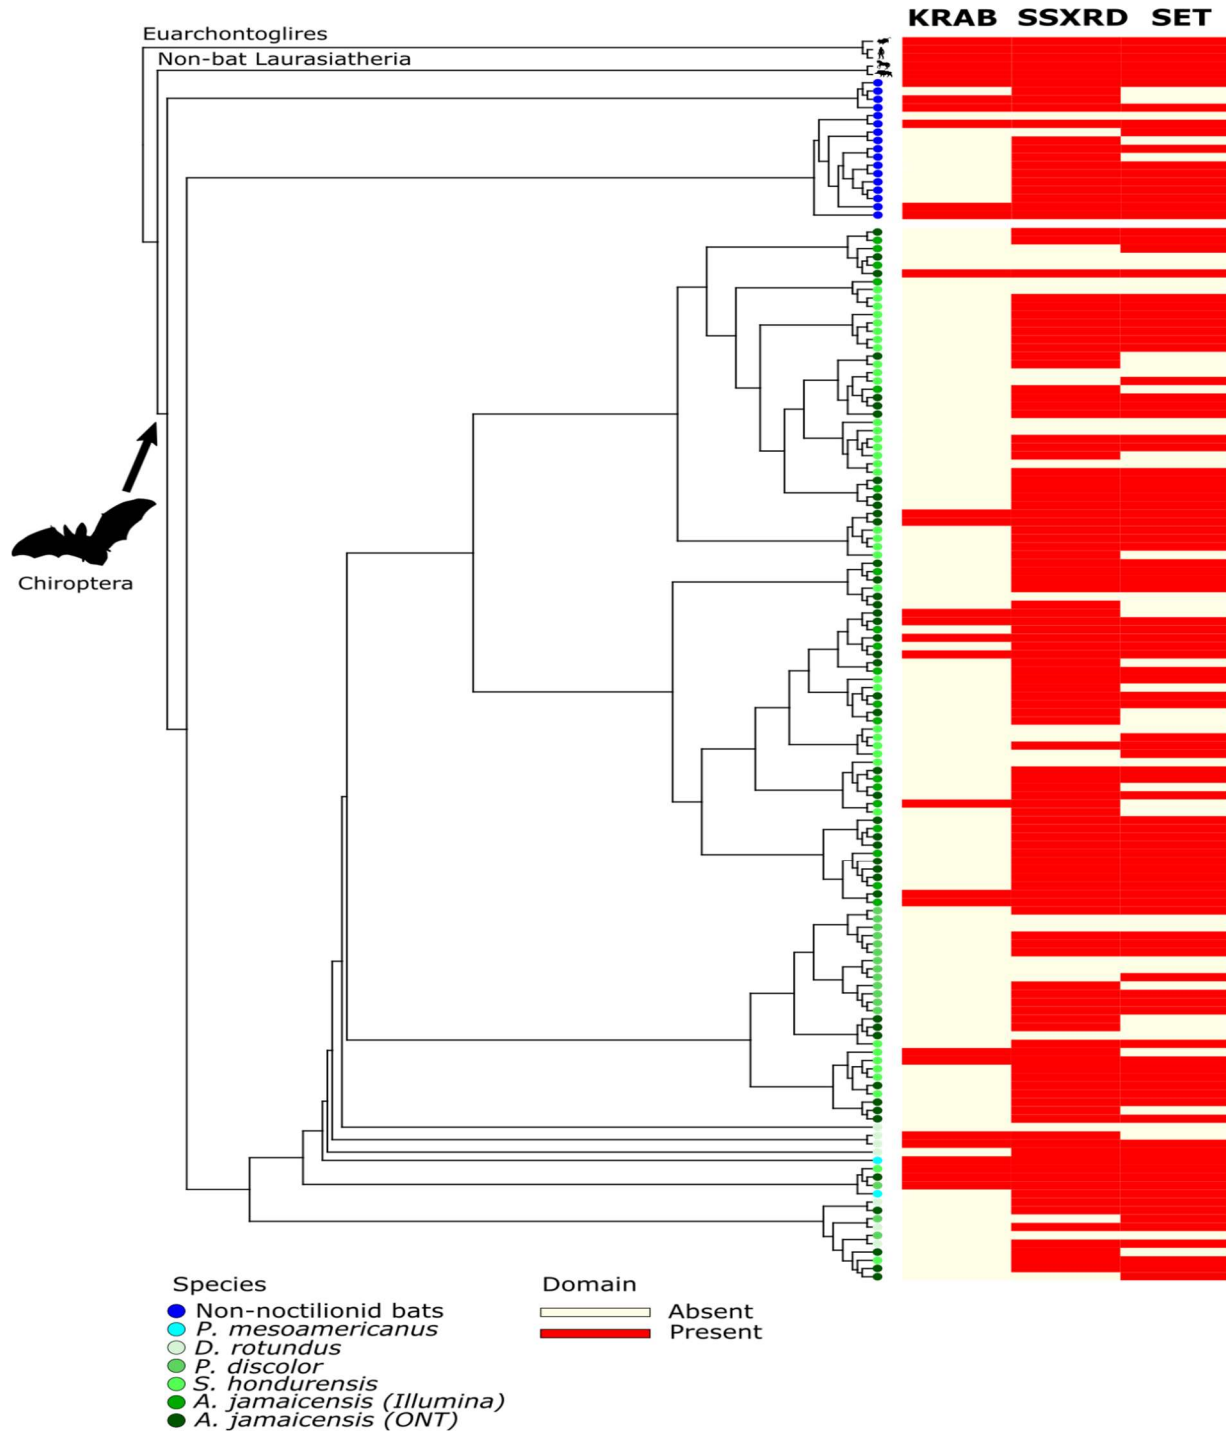

692  
693

694 **Figure S6. Maximum likelihood phylogeny of the PRDM9 orthogroup generated using**  
695 **RAxML under the GTRGAMMA model.** Presence and absence of the key domains KRAB,  
696 SSXRD and SET was determined using pfamscan (<https://www.ebi.ac.uk/Tools/pfa/pfamscan/>)  
697 with default e-value thresholds. The PRDM9 orthologs underwent an expansion in phyllostomid  
698 bats (shown in shades of green). The sequence and topology are provided in **Data S3**.

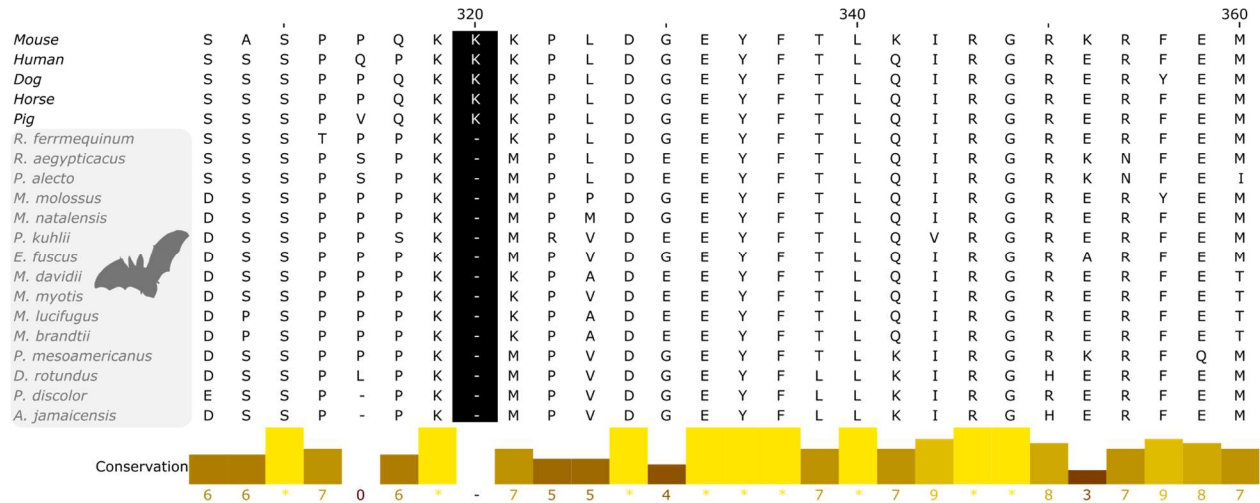

699  
700  
701  
702

**Figure S7. Multiple alignment of TP53 showing a bat-specific deletion (codon 320) in the nuclear localization signal domain.** Amino acid positions are based on the human protein (NP\_000537.3). Image was exported from JalView 2.11.1.4.

## LATS2

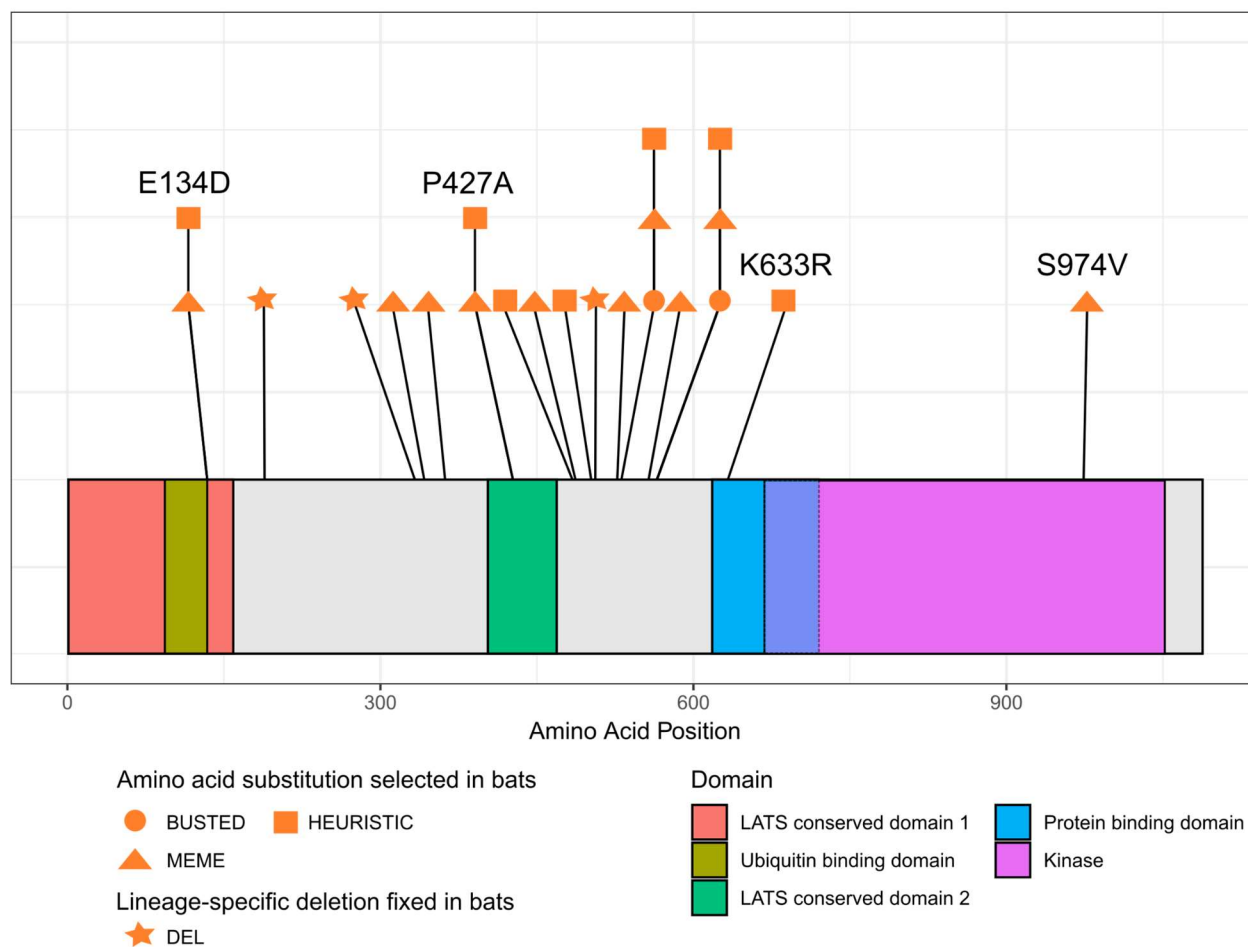

703

704 **Figure S8. Candidate sites under selection in bats in the *LATS2* gene.** Substitutions with  
705 evidence of selection were identified using BUSTED and MEME<sup>55</sup> as well as a simple heuristic  
706 (complete bat-specific fixation of a substitution that is not fixed in the outgroup mammals). Bat-  
707 bat-specific deletions (DEL) were observed to begin in codons 189, 333, and 506 (coordinates based  
708 on human protein XP\_016876030.1). Domain coordinates are based on UniProt and ref<sup>93</sup>  
709 (LCD1:1-159, LCD2:403-469, PBD:618-720, KINASE:668-1052, UBA:98-139).



## 710 References

- 711
- 712 1. Simmons, N. B., Seymour, K. L., Habersetzer, J. & Gunnell, G. F. Primitive Early Eocene bat  
713 from Wyoming and the evolution of flight and echolocation. *Nature* **451**, 818–821 (2008).
- 714 2. Simmons, N. B. & Geisler, J. H. Phylogenetic relationships of Icaronycteris, Archaeonycteris,  
715 Hassianycteris, and Palaeochiropteryx to extant bat lineages, with comments on the  
716 evolution of echolocation and foraging strategies in Microchiroptera. *Bulletin of the AMNH* ;  
717 no. 235. *Relationships of Eocene bats* (1998).
- 718 3. Moss, C. F. & Surlykke, A. Auditory scene analysis by echolocation in bats. *J. Acoust. Soc.*  
719 *Am.* **110**, 2207–2226 (2001).
- 720 4. Wilkinson, G. S. & Adams, D. M. Recurrent evolution of extreme longevity in bats. *Biol. Lett.*  
721 **15**, 20180860 (2019).
- 722 5. Wang, L.-F., Walker, P. J. & Poon, L. L. M. Mass extinctions, biodiversity and mitochondrial  
723 function: are bats 'special' as reservoirs for emerging viruses? *Curr. Opin. Virol.* **1**, 649–657  
724 (2011).
- 725 6. Olival, K. J. *et al.* Host and viral traits predict zoonotic spillover from mammals. *Nature* **546**,  
726 646–650 (2017).
- 727 7. Calisher, C. H., Childs, J. E., Field, H. E., Holmes, K. V. & Schountz, T. Bats: Important  
728 Reservoir Hosts of Emerging Viruses. *Clin. Microbiol. Rev.* **19**, 531–545 (2006).
- 729 8. Amman, B. R. *et al.* Seasonal pulses of Marburg virus circulation in juvenile *Rousettus*  
730 *aegyptiacus* bats coincide with periods of increased risk of human infection. *PLoS Pathog.* **8**,  
731 e1002877 (2012).
- 732 9. Pulliam, J. R. C. *et al.* Agricultural intensification, priming for persistence and the emergence  
733 of Nipah virus: a lethal bat-borne zoonosis. *J. R. Soc. Interface* **9**, 89–101 (2012).
- 734 10. Li, W. *et al.* Bats are natural reservoirs of SARS-like coronaviruses. *Science* **310**, 676–  
735 679 (2005).

- 736 11. Andersen, K. G., Rambaut, A., Lipkin, W. I., Holmes, E. C. & Garry, R. F. The proximal  
737 origin of SARS-CoV-2. *Nat. Med.* **26**, 450–452 (2020).
- 738 12. Pavlovich, S. S. *et al.* The Egyptian rousette genome reveals unexpected features of bat  
739 antiviral immunity. *Cell* **173**, 1098–1110.e18 (2018).
- 740 13. Gonzalez, H., Hagerling, C. & Werb, Z. Roles of the immune system in cancer: from  
741 tumor initiation to metastatic progression. *Genes Dev.* **32**, 1267–1284 (2018).
- 742 14. Teeling, E. C. *et al.* Bat Biology, Genomes, and the Bat1K Project: To Generate  
743 Chromosome-Level Genomes for All Living Bat Species. *Annu. Rev. Anim. Biosci.* **6**, 23–46  
744 (2018).
- 745 15. Dudchenko, O. *et al.* De novo assembly of the *Aedes aegypti* genome using Hi-C yields  
746 chromosome-length scaffolds. *Science* **356**, 92–95 (2017).
- 747 16. Escalera-Zamudio, M. *et al.* The evolution of bat nucleic acid-sensing Toll-like receptors.  
748 *Mol. Ecol.* **24**, 5899–5909 (2015).
- 749 17. Zhang, G. *et al.* Comparative analysis of bat genomes provides insight into the evolution  
750 of flight and immunity. *Science* **339**, 456–460 (2013).
- 751 18. Jebb, D. *et al.* Six reference-quality genomes reveal evolution of bat adaptations. *Nature*  
752 **583**, 578–584 (2020).
- 753 19. Zepeda Mendoza, M. L. *et al.* Hologenomic adaptations underlying the evolution of  
754 sanguivory in the common vampire bat. *Nat. Ecol. Evol.* **2**, 659–668 (2018).
- 755 20. Hawkins, J. A. *et al.* A metaanalysis of bat phylogenetics and positive selection based on  
756 genomes and transcriptomes from 18 species. *Proc. Natl. Acad. Sci.* **116**, 11351–11360  
757 (2019).
- 758 21. Irving, A. T., Ahn, M., Goh, G., Anderson, D. E. & Wang, L.-F. Lessons from the host  
759 defences of bats, a unique viral reservoir. *Nature* **589**, 363–370 (2021).
- 760 22. Gorbunova, V., Seluanov, A. & Kennedy, B. K. The world goes bats: living longer and  
761 tolerating viruses. *Cell Metab.* **32**, 31–43 (2020).

- 762 23. Jiang, H. *et al.* Selective evolution of Toll-like receptors 3, 7, 8, and 9 in bats.  
763 *Immunogenetics* **69**, 271–285 (2017).
- 764 24. Zhou, P. *et al.* Contraction of the type I IFN locus and unusual constitutive expression of  
765 IFN- $\alpha$  in bats. *Proc. Natl. Acad. Sci.* **113**, 2696–2701 (2016).
- 766 25. Fuchs, J. *et al.* Evolution and antiviral specificities of interferon-induced Mx proteins of  
767 bats against ebola, influenza, and other RNA viruses. *J. Virol.* **91**, e00361-17 (2017).
- 768 26. Ahn, M., Cui, J., Irving, A. T. & Wang, L.-F. Unique loss of the PYHIN gene family in bats  
769 amongst mammals: implications for inflammasome sensing. *Sci. Rep.* **6**, 21722 (2016).
- 770 27. Seim, I. *et al.* Genome analysis reveals insights into physiology and longevity of the  
771 Brandt's bat *Myotis brandtii*. *Nat. Commun.* **4**, 2212 (2013).
- 772 28. Taylor, D. J., Dittmar, K., Ballinger, M. J. & Bruenn, J. A. Evolutionary maintenance of  
773 filovirus-like genes in bat genomes. *BMC Evol. Biol.* **11**, 336 (2011).
- 774 29. Rhie, A. *et al.* Towards complete and error-free genome assemblies of all vertebrate  
775 species. *Nature* **592**, 737–746 (2021).
- 776 30. Halo, J. V. *et al.* Long-read assembly of a Great Dane genome highlights the  
777 contribution of GC-rich sequence and mobile elements to canine genomes. *Proc. Natl. Acad.*  
778 *Sci.* **118**, (2021).
- 779 31. Vollger, M. R. *et al.* Long-read sequence and assembly of segmental duplications. *Nat.*  
780 *Methods* **16**, 88–94 (2019).
- 781 32. He, K., Minias, P. & Dunn, P. O. Long-read genome assemblies reveal extraordinary  
782 variation in the number and structure of MHC loci in birds. *Genome Biol. Evol.* **13**, (2021).
- 783 33. Kolmogorov, M., Yuan, J., Lin, Y. & Pevzner, P. A. Assembly of long, error-prone reads  
784 using repeat graphs. *Nat. Biotechnol.* **37**, 540–546 (2019).
- 785 34. Shafin, K. *et al.* *Haplotype-aware variant calling enables high accuracy in nanopore*  
786 *long-reads using deep neural networks*. 2021.03.04.433952  
787 <https://www.biorxiv.org/content/10.1101/2021.03.04.433952v1> (2021)

- 788 doi:10.1101/2021.03.04.433952.
- 789 35. Zimin, A. V. & Salzberg, S. L. The genome polishing tool POLCA makes fast and  
790 accurate corrections in genome assemblies. *PLOS Comput. Biol.* **16**, e1007981 (2020).
- 791 36. McNab, F., Mayer-Barber, K., Sher, A., Wack, A. & O'Garra, A. Type I interferons in  
792 infectious disease. *Nat. Rev. Immunol.* **15**, 87–103 (2015).
- 793 37. Kepler, T. B. *et al.* Chiropteran types I and II interferon genes inferred from genome  
794 sequencing traces by a statistical gene-family assembler. *BMC Genomics* **11**, 444 (2010).
- 795 38. De Bie, T., Cristianini, N., Demuth, J. P. & Hahn, M. W. CAFE: a computational tool for  
796 the study of gene family evolution. *Bioinformatics* **22**, 1269–1271 (2006).
- 797 39. Jaks, E., Gavutis, M., Uzé, G., Martal, J. & Piehler, J. Differential receptor subunit  
798 affinities of type I interferons govern differential signal activation. *J. Mol. Biol.* **366**, 525–539  
799 (2007).
- 800 40. Thomas, C. *et al.* Structural linkage between ligand discrimination and receptor  
801 activation by type I interferons. *Cell* **146**, 621–632 (2011).
- 802 41. de Weerd, N. A., Samarajiwa, S. A. & Hertzog, P. J. Type I interferon receptors:  
803 biochemistry and biological functions. *J. Biol. Chem.* **282**, 20053–20057 (2007).
- 804 42. Hayward, J. A. *et al.* Unique evolution of antiviral tetherin in bats. *bioRxiv*  
805 2020.04.08.031203 (2020) doi:10.1101/2020.04.08.031203.
- 806 43. Benfield, C. T. *et al.* Bat IFITM3 restriction depends on S-palmitoylation and a  
807 polymorphic site within the CD225 domain. *Life Sci. Alliance* **3**, e201900542 (2019).
- 808 44. Bailey, C. C., Zhong, G., Huang, I.-C. & Farzan, M. IFITM-family proteins: the cell's first  
809 line of antiviral defense. *Annu. Rev. Virol.* **1**, 261–283 (2014).
- 810 45. Desai, T. M. *et al.* IFITM3 restricts influenza A virus entry by blocking the formation of  
811 fusion pores following virus-endosome hemifusion. *PLoS Pathog.* **10**, e1004048 (2014).
- 812 46. Chesarino, N. M. *et al.* IFITM3 requires an amphipathic helix for antiviral activity. *EMBO*  
813 *Rep.* **18**, 1740–1751 (2017).

- 814 47. Bailey, C. C., Kondur, H. R., Huang, I.-C. & Farzan, M. Interferon-induced  
815 transmembrane protein 3 is a type II transmembrane protein \*. *J. Biol. Chem.* **288**, 32184–  
816 32193 (2013).
- 817 48. Paigen, K. & Petkov, P. M. PRDM9 and its role in genetic recombination. *Trends Genet.*  
818 **34**, 291–300 (2018).
- 819 49. Baker, Z. *et al.* Repeated losses of PRDM9-directed recombination despite the  
820 conservation of PRDM9 across vertebrates. *eLife* **6**, e24133 (2017).
- 821 50. Schwartz, J. J., Roach, D. J., Thomas, J. H. & Shendure, J. Primate evolution of the  
822 recombination regulator PRDM9. *Nat. Commun.* **5**, 4370 (2014).
- 823 51. Xie, X., Liu, P.-S. & Percipalle, P. Analysis of global transcriptome change in mouse  
824 embryonic fibroblasts after dsDNA and dsRNA viral mimic stimulation. *Front. Immunol.* **0**,  
825 (2019).
- 826 52. Tsan, M.-F. & Gao, B. Heat shock proteins and immune system. *J. Leukoc. Biol.* **85**,  
827 905–910 (2009).
- 828 53. Zhang, J., Nielsen, R. & Yang, Z. Evaluation of an improved branch-site likelihood  
829 method for detecting positive selection at the molecular level. *Mol. Biol. Evol.* **22**, 2472–2479  
830 (2005).
- 831 54. Yang, Z. & Nielsen, R. Codon-substitution models for detecting molecular adaptation at  
832 individual sites along specific lineages. *Mol. Biol. Evol.* **19**, 908–917 (2002).
- 833 55. Smith, M. D. *et al.* Less is more: an adaptive branch-site random effects model for  
834 efficient detection of episodic diversifying selection. *Mol. Biol. Evol.* **32**, 1342–1353 (2015).
- 835 56. Potter, J. H. T. *et al.* Dietary diversification and specialization in Neotropical bats  
836 facilitated by early molecular evolution. *Mol. Biol. Evol.* (2021) doi:10.1093/molbev/msab028.
- 837 57. Kacprzyk, J. *et al.* Evolution of mammalian longevity: age-related increase in autophagy  
838 in bats compared to other mammals. *Aging* **13**, 7998–8025 (2021).
- 839 58. Banerjee, A., Rapin, N., Bollinger, T. & Misra, V. Lack of inflammatory gene expression

- 840 in bats: a unique role for a transcription repressor. *Sci. Rep.* **7**, (2017).
- 841 59. Xie, J. *et al.* Dampened STING-dependent interferon activation in bats. *Cell Host*  
842 *Microbe* **23**, 297-301.e4 (2018).
- 843 60. Ahn, M. *et al.* Dampened NLRP3-mediated inflammation in bats and implications for a  
844 special viral reservoir host. *Nat. Microbiol.* **4**, 789–799 (2019).
- 845 61. Decout, A., Katz, J. D., Venkatraman, S. & Ablasser, A. The cGAS–STING pathway as a  
846 therapeutic target in inflammatory diseases. *Nat. Rev. Immunol.* 1–22 (2021)  
847 doi:10.1038/s41577-021-00524-z.
- 848 62. Fitzgerald, K. A. & Kagan, J. C. Toll-like receptors and the control of immunity. *Cell* **180**,  
849 1044–1066 (2020).
- 850 63. Hennessy, E. J., Parker, A. E. & O’Neill, L. A. J. Targeting Toll-like receptors: emerging  
851 therapeutics? *Nat. Rev. Drug Discov.* **9**, 293–307 (2010).
- 852 64. Gouravani, M. *et al.* The NLRP3 inflammasome: a therapeutic target for inflammation-  
853 associated cancers. *Expert Rev. Clin. Immunol.* **16**, 175–187 (2020).
- 854 65. de Oliveira Nascimento, L., Massari, P. & Wetzler, L. M. The Role of TLR2 in infection  
855 and immunity. *Front. Immunol.* **3**, (2012).
- 856 66. Zheng, M. *et al.* TLR2 senses the SARS-CoV-2 envelope protein to produce  
857 inflammatory cytokines. *Nat. Immunol.* **22**, 829–838 (2021).
- 858 67. Kim, Y.-M., Brinkmann, M. M., Paquet, M.-E. & Ploegh, H. L. UNC93B1 delivers  
859 nucleotide-sensing toll-like receptors to endolysosomes. *Nature* **452**, 234–238 (2008).
- 860 68. Panchanathan, R., Liu, H. & Choubey, D. Expression of murine Unc93b1 is up-regulated  
861 by interferon and estrogen signaling: implications for sex bias in the development of  
862 autoimmunity. *Int. Immunol.* **25**, 521–529 (2013).
- 863 69. Pelka, K. *et al.* The chaperone UNC93B1 regulates Toll-like receptor stability  
864 independently of endosomal TLR transport. *Immunity* **48**, 911-922.e7 (2018).
- 865 70. Lee, B. L. *et al.* UNC93B1 mediates differential trafficking of endosomal TLRs. *eLife* **2**,

- 866 e00291 (2013).
- 867 71. Garlanda, C., Dinarello, C. A. & Mantovani, A. The interleukin-1 family: back to the  
868 future. *Immunity* **39**, 1003–1018 (2013).
- 869 72. Veldhoen, M. Interleukin 17 is a chief orchestrator of immunity. *Nat. Immunol.* **18**, 612–  
870 621 (2017).
- 871 73. Velazquez-Salinas, L., Verdugo-Rodriguez, A., Rodriguez, L. L. & Borca, M. V. The role  
872 of interleukin 6 during viral infections. *Front. Microbiol.* **10**, (2019).
- 873 74. Hayward, J. A. *et al.* Differential evolution of antiretroviral restriction factors in pteropid  
874 bats as revealed by APOBEC3 gene complexity. *Mol. Biol. Evol.* **35**, 1626–1637 (2018).
- 875 75. Zhang, Y. *et al.* PARP9-DTX3L ubiquitin ligase targets host histone H2BJ and viral 3C  
876 protease to enhance interferon signaling and control viral infection. *Nat. Immunol.* **16**, 1215–  
877 1227 (2015).
- 878 76. Xing, J. *et al.* Identification of poly(ADP-ribose) polymerase 9 (PARP9) as a  
879 noncanonical sensor for RNA virus in dendritic cells. *Nat. Commun.* **12**, 2681 (2021).
- 880 77. Fensterl, V. & Sen, G. C. Interferon-induced IFIT proteins: their role in viral  
881 pathogenesis. *J. Virol.* **89**, 2462–2468 (2014).
- 882 78. Diamond, M. S. & Farzan, M. The broad-spectrum antiviral functions of IFIT and IFITM  
883 proteins. *Nat. Rev. Immunol.* **13**, 46–57 (2013).
- 884 79. Yang, Z. *et al.* Crystal structure of ISG54 reveals a novel RNA binding structure and  
885 potential functional mechanisms. *Cell Res.* **22**, 1328–1338 (2012).
- 886 80. Zhu, H. & Zheng, C. When PARPs meet antiviral innate immunity. *Trends Microbiol.* **29**,  
887 776–778 (2021).
- 888 81. Foster, T. L. *et al.* Resistance of transmitted founder HIV-1 to IFITM-mediated restriction.  
889 *Cell Host Microbe* **20**, 429–442 (2016).
- 890 82. Brass, A. L. *et al.* The IFITM proteins mediate cellular resistance to influenza A H1N1  
891 virus, West Nile virus, and dengue virus. *Cell* **139**, 1243–1254 (2009).

- 892 83. Tollis, M., Schiffman, J. D. & Boddy, A. M. Evolution of cancer suppression as revealed  
893 by mammalian comparative genomics. *Curr. Opin. Genet. Dev.* **42**, 40–47 (2017).
- 894 84. Zhao, M., Kim, P., Mitra, R., Zhao, J. & Zhao, Z. TSGene 2.0: an updated literature-  
895 based knowledgebase for tumor suppressor genes. *Nucleic Acids Res.* **44**, D1023-1031  
896 (2016).
- 897 85. Forbes, S. A. *et al.* COSMIC: mining complete cancer genomes in the Catalogue of  
898 Somatic Mutations in Cancer. *Nucleic Acids Res.* **39**, D945–D950 (2011).
- 899 86. Sy, S. M. H., Huen, M. S. Y. & Chen, J. PALB2 is an integral component of the BRCA  
900 complex required for homologous recombination repair. *Proc. Natl. Acad. Sci.* **106**, 7155–  
901 7160 (2009).
- 902 87. Deveryshetty, J. *et al.* Novel RNA and DNA strand exchange activity of the PALB2 DNA  
903 binding domain and its critical role for DNA repair in cells. *eLife* **8**, e44063 (2019).
- 904 88. Belotserkovskaya, R. *et al.* PALB2 chromatin recruitment restores homologous  
905 recombination in BRCA1-deficient cells depleted of 53BP1. *Nat. Commun.* **11**, 819 (2020).
- 906 89. Kosiol, C. *et al.* Patterns of positive selection in six mammalian genomes. *PLoS Genet.*  
907 **4**, (2008).
- 908 90. Nielsen, R. *et al.* A scan for positively selected genes in the genomes of humans and  
909 chimpanzees. *PLOS Biol.* **3**, e170 (2005).
- 910 91. Furth, N. & Aylon, Y. The LATS1 and LATS2 tumor suppressors: beyond the Hippo  
911 pathway. *Cell Death Differ.* **24**, 1488–1501 (2017).
- 912 92. Reumers, J. *et al.* SNPeffect: a database mapping molecular phenotypic effects of  
913 human non-synonymous coding SNPs. *Nucleic Acids Res.* **33**, D527–D532 (2005).
- 914 93. Yu, T., Bachman, J. & Lai, Z.-C. Mutation analysis of large tumor suppressor genes  
915 LATS1 and LATS2 supports a tumor suppressor role in human cancer. *Protein Cell* **6**, 6–11  
916 (2015).
- 917 94. Zou, Y. *et al.* Systemic tumor suppression by the proapoptotic gene bik. *Cancer Res.* **62**,



- 918 8–12 (2002).
- 919 95. Huang, D. C. & Strasser, A. BH3-Only proteins-essential initiators of apoptotic cell death.  
920 *Cell* **103**, 839–842 (2000).
- 921 96. López, I. *et al.* p53-mediated suppression of BiP triggers BIK-induced apoptosis during  
922 prolonged endoplasmic reticulum stress. *Cell Death Differ.* **24**, 1717–1729 (2017).
- 923 97. Hur, J. *et al.* Regulation of expression of BIK proapoptotic protein in human breast  
924 cancer cells: p53-dependent induction of BIK mRNA by fulvestrant and proteasomal  
925 degradation of BIK protein. *Cancer Res.* **66**, 10153–10161 (2006).
- 926 98. Real, P. J. *et al.* Transcriptional activation of the proapoptotic bik gene by E2F proteins  
927 in cancer cells. *FEBS Lett.* **580**, 5905–5909 (2006).
- 928 99. Yu, W., Yang, L., Li, T. & Zhang, Y. Cadherin signaling in cancer: its functions and role  
929 as a therapeutic target. *Front. Oncol.* **9**, (2019).
- 930 100. Glorieux, C. & Calderon, P. B. Catalase, a remarkable enzyme: targeting the oldest  
931 antioxidant enzyme to find a new cancer treatment approach. *Biol. Chem.* **398**, 1095–1108  
932 (2017).
- 933 101. Kang, M. Y. *et al.* The critical role of catalase in prooxidant and antioxidant function of  
934 p53. *Cell Death Differ.* **20**, 117–129 (2013).
- 935 102. Slodkowicz, G. & Goldman, N. Integrated structural and evolutionary analysis reveals  
936 common mechanisms underlying adaptive evolution in mammals. *Proc. Natl. Acad. Sci.* **117**,  
937 5977–5986 (2020).
- 938 103. Enard, D., Cai, L., Gwennap, C. & Petrov, D. A. Viruses are a dominant driver of protein  
939 adaptation in mammals. *eLife* **5**, e12469 (2016).
- 940 104. Vicens, A. & Posada, D. Selective Pressures on Human Cancer Genes along the  
941 Evolution of Mammals. *Genes* **9**, 582 (2018).
- 942 105. Murrell, B. *et al.* Detecting individual sites subject to episodic diversifying selection.  
943 *PLOS Genet.* **8**, e1002764 (2012).

- 944 106. Goh, G. *et al.* Complementary regulation of caspase-1 and IL-1 $\beta$  reveals additional  
945 mechanisms of dampened inflammation in bats. *Proc. Natl. Acad. Sci.* **117**, 28939–28949  
946 (2020).
- 947 107. Yu, X. *et al.* Inflammasome activation negatively regulates MyD88-IRF7 type I IFN  
948 signaling and anti-malaria immunity. *Nat. Commun.* **9**, 4964 (2018).
- 949 108. Banerjee, A. *et al.* Positive selection of a serine residue in bat IRF3 confers enhanced  
950 antiviral protection. *iScience* **23**, 100958 (2020).
- 951 109. Li, S. *et al.* Interferon-omega: Current status in clinical applications. *Int.*  
952 *Immunopharmacol.* **52**, 253–260 (2017).
- 953 110. Zhao, X. *et al.* Characterization and virus-induced expression profiles of the porcine  
954 interferon-omega multigene family. *J. Interferon Cytokine Res. Off. J. Int. Soc. Interferon*  
955 *Cytokine Res.* **29**, 687–693 (2009).
- 956 111. Tejada-Martinez, D., de Magalhães, J. P. & Opazo, J. C. Positive selection and gene  
957 duplications in tumour suppressor genes reveal clues about how cetaceans resist cancer.  
958 *Proc. R. Soc. B Biol. Sci.* **288**, 20202592 (2021).
- 959 112. Fonseca, R. R. da, Kosiol, C., Vinař, T., Siepel, A. & Nielsen, R. Positive selection on  
960 apoptosis related genes. *FEBS Lett.* **584**, 469–476 (2010).
- 961 113. Ostrand-Rosenberg, S. Immune surveillance: a balance between protumor and  
962 antitumor immunity. *Curr. Opin. Genet. Dev.* **18**, 11–18 (2008).
- 963 114. Li, D. *et al.* KLF4-mediated negative regulation of IFITM3 expression plays a critical role  
964 in colon cancer pathogenesis. *Clin. Cancer Res. Off. J. Am. Assoc. Cancer Res.* **17**, 3558–  
965 3568 (2011).
- 966 115. Siegrist, F., Ebeling, M. & Certa, U. The small interferon-induced transmembrane genes  
967 and proteins. *J. Interferon Cytokine Res. Off. J. Int. Soc. Interferon Cytokine Res.* **31**, 183–  
968 197 (2011).
- 969 116. Alteber, Z. *et al.* The anti-inflammatory IFITM genes ameliorate colitis and partially

- 970 protect from tumorigenesis by changing immunity and microbiota. *Immunol. Cell Biol.* **96**,  
971 284–297 (2018).
- 972 117. Yang, Y., Wang, H., Kouadir, M., Song, H. & Shi, F. Recent advances in the  
973 mechanisms of NLRP3 inflammasome activation and its inhibitors. *Cell Death Dis.* **10**, 1–11  
974 (2019).
- 975 118. Moossavi, M., Parsamanesh, N., Bahrami, A., Atkin, S. L. & Sahebkar, A. Role of the  
976 NLRP3 inflammasome in cancer. *Mol. Cancer* **17**, 158 (2018).
- 977 119. Pidugu, V. K., Pidugu, H. B., Wu, M.-M., Liu, C.-J. & Lee, T.-C. Emerging Functions of  
978 Human IFIT Proteins in Cancer. *Front. Mol. Biosci.* **0**, (2019).
- 979 120. Lu, C. *et al.* Type I interferon suppresses tumor growth through activating the STAT3-  
980 granzyme B pathway in tumor-infiltrating cytotoxic T lymphocytes. *J. Immunother. Cancer* **7**,  
981 157 (2019).
- 982 121. Aricò, E., Castiello, L., Capone, I., Gabriele, L. & Belardelli, F. Type I interferons and  
983 cancer: an evolving story demanding novel clinical applications. *Cancers* **11**, 1943 (2019).
- 984 122. Marín-Aguilar, F. *et al.* NLRP3 inflammasome suppression improves longevity and  
985 prevents cardiac aging in male mice. *Aging Cell* **19**, e13050 (2020).
- 986 123. Youm, Y.-H. *et al.* Canonical NLRP3 inflammasome links systemic low-grade  
987 inflammation to functional decline in aging. *Cell Metab.* **18**, 519–532 (2013).
- 988 124. Lee, H. E. *et al.* Inhibition of NLRP3 inflammasome in tumor microenvironment leads to  
989 suppression of metastatic potential of cancer cells. *Sci. Rep.* **9**, 12277 (2019).
- 990 125. Tengesdal, I. W. *et al.* Targeting tumor-derived NLRP3 reduces melanoma progression  
991 by limiting MDSCs expansion. *Proc. Natl. Acad. Sci.* **118**, (2021).
- 992 126. Sikes, R. S. 2016 Guidelines of the American Society of Mammalogists for the use of  
993 wild mammals in research and education. *J. Mammal.* **97**, 663–688 (2016).
- 994 127. Ruan, J. & Li, H. Fast and accurate long-read assembly with wtdbg2. *Nat. Methods* **17**,  
995 155–158 (2020).

- 996 128. Shafin, K. *et al.* Nanopore sequencing and the Shasta toolkit enable efficient de novo  
997 assembly of eleven human genomes. *Nat. Biotechnol.* **38**, 1044–1053 (2020).
- 998 129. Li, H. Minimap2: pairwise alignment for nucleotide sequences. *Bioinformatics* **34**, 3094–  
999 3100 (2018).
- 1000 130. Li, H. Aligning sequence reads, clone sequences and assembly contigs with BWA-MEM.  
1001 *ArXiv13033997 Q-Bio* (2013).
- 1002 131. Rhie, A., Walenz, B. P., Koren, S. & Phillippy, A. M. Merqury: reference-free quality,  
1003 completeness, and phasing assessment for genome assemblies. *Genome Biol.* **21**, 245  
1004 (2020).
- 1005 132. Simão, F. A., Waterhouse, R. M., Ioannidis, P., Kriventseva, E. V. & Zdobnov, E. M.  
1006 BUSCO: assessing genome assembly and annotation completeness with single-copy  
1007 orthologs. *Bioinformatics* **31**, 3210–3212 (2015).
- 1008 133. Guan, D. *et al.* Identifying and removing haplotypic duplication in primary genome  
1009 assemblies. *Bioinformatics* **36**, 2896–2898 (2020).
- 1010 134. Armstrong, J. *et al.* Progressive Cactus is a multiple-genome aligner for the thousand-  
1011 genome era. *Nature* **587**, 246–251 (2020).
- 1012 135. Kim, D., Paggi, J. M., Park, C., Bennett, C. & Salzberg, S. L. Graph-based genome  
1013 alignment and genotyping with HISAT2 and HISAT-genotype. *Nat. Biotechnol.* **37**, 907–915  
1014 (2019).
- 1015 136. Kovaka, S. *et al.* Transcriptome assembly from long-read RNA-seq alignments with  
1016 StringTie2. *Genome Biol.* **20**, (2019).
- 1017 137. Grabherr, M. G. *et al.* Full-length transcriptome assembly from RNA-Seq data without a  
1018 reference genome. *Nat. Biotechnol.* **29**, 644–652 (2011).
- 1019 138. Haas, B. J. *et al.* Improving the Arabidopsis genome annotation using maximal transcript  
1020 alignment assemblies. *Nucleic Acids Res.* **31**, 5654–5666 (2003).
- 1021 139. Wu, T. D. & Watanabe, C. K. GMAP: a genomic mapping and alignment program for

- 1022 mRNA and EST sequences. *Bioinforma. Oxf. Engl.* **21**, 1859–1875 (2005).
- 1023 140. Kent, W. J. BLAT—The BLAST-Like Alignment Tool. *Genome Res.* **12**, 656–664 (2002).
- 1024 141. Haas, B. J. *et al.* De novo transcript sequence reconstruction from RNA-seq using the  
1025 Trinity platform for reference generation and analysis. *Nat. Protoc.* **8**, 1494–1512 (2013).
- 1026 142. Cantarel, B. L. *et al.* MAKER: An easy-to-use annotation pipeline designed for emerging  
1027 model organism genomes. *Genome Res.* **18**, 188–196 (2008).
- 1028 143. Korf, I. Gene finding in novel genomes. *BMC Bioinformatics* **5**, 59 (2004).
- 1029 144. Stanke, M. *et al.* AUGUSTUS: ab initio prediction of alternative transcripts. *Nucleic Acids*  
1030 *Res.* **34**, W435–W439 (2006).
- 1031 145. Majoros, W. H., Pertea, M. & Salzberg, S. L. TigrScan and GlimmerHMM: two open  
1032 source ab initio eukaryotic gene-finders. *Bioinformatics* **20**, 2878–2879 (2004).
- 1033 146. Lomsadze, A., Ter-Hovhannisyan, V., Chernoff, Y. O. & Borodovsky, M. Gene  
1034 identification in novel eukaryotic genomes by self-training algorithm. *Nucleic Acids Res.* **33**,  
1035 6494–6506 (2005).
- 1036 147. Haas, B. J. *et al.* Automated eukaryotic gene structure annotation using  
1037 EVidenceModeler and the Program to Assemble Spliced Alignments. *Genome Biol.* **9**, R7  
1038 (2008).
- 1039 148. Tarailo-Graovac, M. & Chen, N. Using RepeatMasker to identify repetitive elements in  
1040 genomic sequences. *Curr. Protoc. Bioinforma.* **Chapter 4**, Unit 4.10 (2009).
- 1041 149. Fu, L., Niu, B., Zhu, Z., Wu, S. & Li, W. CD-HIT: accelerated for clustering the next-  
1042 generation sequencing data. *Bioinformatics* **28**, 3150–3152 (2012).
- 1043 150. Wicker, T. *et al.* A unified classification system for eukaryotic transposable elements.  
1044 *Nat. Rev. Genet.* **8**, 973–982 (2007).
- 1045 151. Abrusán, G., Grundmann, N., DeMester, L. & Makalowski, W. TEclass—a tool for  
1046 automated classification of unknown eukaryotic transposable elements. *Bioinformatics* **25**,  
1047 1329–1330 (2009).

- 1048 152. Yan, H., Bombarely, A. & Li, S. DeepTE: a computational method for de novo  
1049 classification of transposons with convolutional neural network. *Bioinformatics*  
1050 doi:10.1093/bioinformatics/btaa519.
- 1051 153. Kumar, S. & Subramanian, S. Mutation rates in mammalian genomes. *Proc. Natl. Acad.*  
1052 *Sci.* **99**, 803–808 (2002).
- 1053 154. Bigot, T., Temmam, S., Pérot, P. & Eloit, M. RVDB-prot, a reference viral protein  
1054 database and its HMM profiles. *F1000Research* **8**, 530 (2019).
- 1055 155. Shen, W. & Xiong, J. TaxonKit: a cross-platform and efficient NCBI taxonomy toolkit.  
1056 *bioRxiv* 513523 (2019) doi:10.1101/513523.
- 1057 156. Emms, D. M. & Kelly, S. OrthoFinder: phylogenetic orthology inference for comparative  
1058 genomics. *Genome Biol.* **20**, 238 (2019).
- 1059 157. Löytynoja, A. Phylogeny-aware alignment with PRANK. *Methods Mol. Biol. Clifton NJ*  
1060 **1079**, 155–170 (2014).
- 1061 158. Stamatakis, A. RAxML version 8: a tool for phylogenetic analysis and post-analysis of  
1062 large phylogenies. *Bioinforma. Oxf. Engl.* **30**, 1312–1313 (2014).
- 1063 159. Kumar, S., Stecher, G., Suleski, M. & Hedges, S. B. TimeTree: a resource for timelines,  
1064 timetrees, and divergence times. *Mol. Biol. Evol.* **34**, 1812–1819 (2017).
- 1065 160. Rambaut, A., Drummond, A. J., Xie, D., Baele, G. & Suchard, M. A. Posterior  
1066 summarization in Bayesian phylogenetics using tracer 1.7. *Syst. Biol.* **67**, 901–904 (2018).
- 1067 161. Durinck, S. *et al.* BioMart and Bioconductor: a powerful link between biological  
1068 databases and microarray data analysis. *Bioinforma. Oxf. Engl.* **21**, 3439–3440 (2005).
- 1069 162. Guy, L., Roat Kultima, J. & Andersson, S. G. E. genoPlotR: comparative gene and  
1070 genome visualization in R. *Bioinformatics* **26**, 2334–2335 (2010).
- 1071 163. Zhang, J., Nielsen, R. & Yang, Z. Evaluation of an improved branch-site likelihood  
1072 method for detecting positive selection at the molecular level. *Mol. Biol. Evol.* **22**, 2472–2479  
1073 (2005).

- 1074 164. Doronina, L. *et al.* Speciation network in Laurasiatheria: retrophylogenomic signals.  
1075 *Genome Res.* **27**, 997–1003 (2017).  
1076 165. Alexa, A. & Rahnenfuhrer, J. topGO: Enrichment Analysis for Gene Ontology. R  
1077 package version 2.44.0 (2021).
